# Supplementary material for: Guerbet-type β-alkylation of secondary alcohols catalyzed by chromium chloride and its corresponding NNN pincer complex
Source: Royal Society of Chemistry journal article supplement (doi:10.1039/d2cy00759b), 2022-01-01
Supplement: d2cy00759b1.pdf [file d2cy00759b1.pdf]

## Supporting information

### **Guerbet-Type $\beta$ -alkylation of Secondary Alcohols Catalyzed by Chromium Chloride and its Corresponding NNN Pincer Complex**

Himani Narjinari,<sup>a</sup> Niharika Tanwar,<sup>b</sup> Lakshay Kathuria,<sup>a</sup> Raksh Vir Jasra,<sup>b,c</sup> Akshai Kumar<sup>\*a,b,d</sup>

<sup>a</sup>Department of Chemistry, Indian Institute of Technology Guwahati, Guwahati – 781039, Assam, India

<sup>b</sup>Center for Nanotechnology, Indian Institute of Technology Guwahati, Guwahati – 781039, Assam, India

<sup>c</sup>Reliance Industries limited, R&D Centre, Vadodara Manufacturing Division, Vadodara, 391 346, Gujarat

<sup>d</sup>Jyoti and Bhupat School of Health Sciences and Technology, Indian Institute of Technology Guwahati, Guwahati – 781039, Assam, India.

Email: [akshaikumar@iitg.ac.in](mailto:akshaikumar@iitg.ac.in)

#### **Table of content**

| <b>S No</b> | <b>Content</b>                                           | <b>Page</b> |
|-------------|----------------------------------------------------------|-------------|
| 1.          | <b>Optimization Table</b>                                | S2-S4       |
| 2.          | <b>HRMS analysis</b>                                     | S5-S13      |
| 3.          | <b>GC analysis</b>                                       | S14-S16     |
| 4.          | <b>EPR Spectra</b>                                       | S16         |
| 5.          | <b>NMR Spectra</b>                                       | S17-S37     |
| 6.          | <b>Calculation of KIE</b>                                | S38         |
| 7.          | <b>Determination of magnetic moment by Evan's method</b> | S38         |
| 8.          | <b>References</b>                                        | S38         |

## 1. Optimization:

**Table S1. Optimization of the chromium catalyzed solvent-free  $\beta$ -alkylation of 1-phenylethanol with benzyl alcohol under conventional heating<sup>a</sup>**

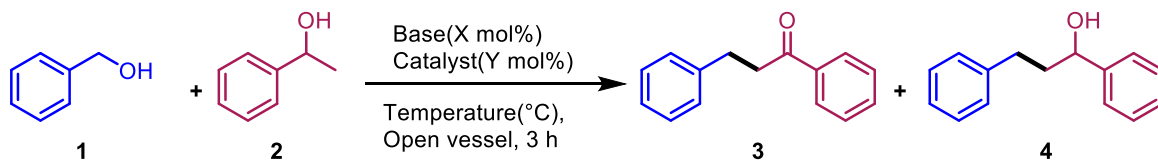

| Entry           | Base (X mol%) <sup>b</sup>          | Catalyst(Y mol%) <sup>b</sup>               | Yield(%) <sup>c</sup> and [TON] <sup>f</sup> |            | Selectivity of 4=((Yield of 4/Total yield 4+3)*100) |
|-----------------|-------------------------------------|---------------------------------------------|----------------------------------------------|------------|-----------------------------------------------------|
|                 |                                     |                                             | 4                                            | 3          |                                                     |
| 1               | Na <sub>2</sub> CO <sub>3</sub> (5) | 5(0.005)                                    | 0[0]                                         | 0[0]       | 0                                                   |
| 2               | NaHCO <sub>3</sub> (5)              | 5(0.005)                                    | 0[0]                                         | 0[0]       | 0                                                   |
| 3               | K <sub>2</sub> CO <sub>3</sub> (5)  | 5(0.005)                                    | 0[0]                                         | 0[0]       | 0                                                   |
| 4               | KO <sup>t</sup> Bu (5)              | 5(0.005)                                    | 5[1000]                                      | 2[400]     | 71                                                  |
| 5               | KOH (5)                             | 5(0.005)                                    | 5±2[1000]                                    | 4±0[800]   | 56                                                  |
| 6               | NaOH (5)                            | 5(0.005)                                    | 45±0.3[9000]                                 | 4[800]     | 92                                                  |
| 7               | NaOH (2.5)                          | 5(0.005)                                    | 11±2[2200]                                   | 5±1[1000]  | 69                                                  |
| 8               | NaOH (1.25)                         | 5(0.005)                                    | 3±1[600]                                     | 2±1[400]   | 60                                                  |
| 9               | NaO <sup>t</sup> Bu (5)             | 5(0.005)                                    | 84±0.3[16800]                                | 8±1[1600]  | 91                                                  |
| 10              | NaO <sup>t</sup> Bu (2.5)           | 5(0.005)                                    | 9±2[1800]                                    | 3±1[600]   | 75                                                  |
| 11              | NaO <sup>t</sup> Bu (1.25)          | 5(0.005)                                    | 2±0.3[400]                                   | 1±1[200]   | 67                                                  |
| 12              | NaO <sup>t</sup> Bu (5)             | 5(0.01)                                     | 70[7000]                                     | 6[600]     | 92                                                  |
| 13              | NaO <sup>t</sup> Bu (5)             | 5(0.0075)                                   | 70±2[9333]                                   | 6±1[800]   | 92                                                  |
| 14              | NaO <sup>t</sup> Bu (5)             | 5(0.0025)                                   | 71±0.1[14200]                                | 5±1[1000]  | 93                                                  |
| 15              | NaO <sup>t</sup> Bu (5)             | 5(0.00125)                                  | 61±2[12200]                                  | 3±1[600]   | 95                                                  |
| 16 <sup>d</sup> | NaO <sup>t</sup> Bu (5)             | 5 (0.005)                                   | 12±2[2400]                                   | 3±1[600]   | 80                                                  |
| 17 <sup>e</sup> | NaO <sup>t</sup> Bu (5)             | 5(0.005)                                    | 5±0.5[1000]                                  | 2±1[400]   | 71                                                  |
| 18              | NaO <sup>t</sup> Bu (5)             | CrCl <sub>3</sub> .6H <sub>2</sub> O(0.005) | 79±2[15800]                                  | 12±1[2400] | 87                                                  |
| 19              | NaO <sup>t</sup> Bu (5)             | –                                           | 8                                            | 2          | 80                                                  |
| 20              | –                                   | CrCl <sub>3</sub> .6H <sub>2</sub> O(0.005) | 0                                            | 0          | 0                                                   |
| 21              | –                                   | 5 (0.005)                                   | 0                                            | 0          | 0                                                   |

<sup>a</sup>Conditions: Benzyl alcohol (4 mmol), 1-phenylethanol (4 mmol), base (X mol%), and Cr catalyst (Y mol%) were heated together at 140 °C for 3 hours. <sup>b</sup>Mol% of base is with respect to total alcohol content (1+2). <sup>c</sup>Yield determined from <sup>1</sup>H NMR analysis using toluene as an internal standard. Yields reported are the average of two runs. <sup>d</sup>Reaction performed at 120 °C. <sup>e</sup>Reaction performed at 100 °C. <sup>f</sup>TON are written in the parenthesis.

**Table S2. Chromium catalyzed solvent-free  $\beta$ -alkylation of 1-phenyl ethanol with benzyl alcohol under microwave conditions<sup>a</sup>**

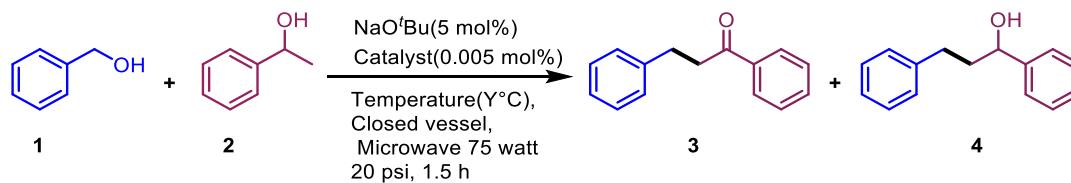

| Entry | Temperature | Catalyst<br>(0.005 mol %) <sup>b</sup> | Yield (%) <sup>c</sup> and [TON] <sup>f</sup> |          | Selectivity of <b>4</b> =<br>(Yield of <b>4</b> /Total yield<br><b>4+3</b> )*100) |
|-------|-------------|----------------------------------------|-----------------------------------------------|----------|-----------------------------------------------------------------------------------|
|       | (T °C)      |                                        | <b>4</b>                                      | <b>3</b> |                                                                                   |
| 1     | 140         | 5                                      | 90[18000]                                     | 7[1400]  | 93                                                                                |
| 2     | 120         | 5                                      | 26[5200]                                      | 2[400]   | 93                                                                                |
| 3     | 100         | 5                                      | 8[1600]                                       | 2[400]   | 80                                                                                |
| 4     | 140         | CrCl <sub>3</sub> ·6H <sub>2</sub> O   | 76[15200]                                     | 3[600]   | 96                                                                                |
| 5     | 120         | CrCl <sub>3</sub> ·6H <sub>2</sub> O   | 31[6200]                                      | 3[600]   | 91                                                                                |

<sup>a</sup>Conditions: Benzyl alcohol (2 mmol), 1-phenyl ethanol (2 mmol), NaO<sup>t</sup>Bu (5 mol%), and Cr catalyst (0.005 mol%) were heated together in air at 140 °C for 1.5 hours under 75 W microwave irradiation. <sup>b</sup>Mol% of base and catalyst is with respect to total alcohol content (**1+2**). <sup>c</sup>Yield determined from <sup>1</sup>H NMR analysis using toluene as an internal standard. Yields reported are the average of two runs. <sup>f</sup>TON are written in the parenthesis.

**Table S3. Effect of hot filtration and mercury drop test in the chromium catalyzed solvent-free  $\beta$ -alkylation of 1-phenyl ethanol with benzyl alcohol under conventional heating <sup>a</sup>**

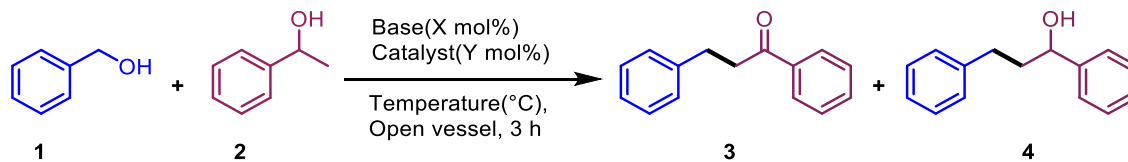

| Entry          | Base (5 mol%) <sup>b</sup> | Catalyst (Y mol %) <sup>b</sup>      | Yield(%) <sup>c</sup> and [TON] <sup>f</sup> |            | Selectivity of <b>4</b> = ((Yield of <b>4</b> /Total yield <b>4+3</b> )*100) |
|----------------|----------------------------|--------------------------------------|----------------------------------------------|------------|------------------------------------------------------------------------------|
|                |                            |                                      | <b>4</b>                                     | <b>3</b>   |                                                                              |
| 1              | NaO <sup>t</sup> Bu        | 5                                    | 84±0.3[16800]                                | 8±1[1600]  | 91                                                                           |
| 2 <sup>d</sup> | NaO <sup>t</sup> Bu        | 5                                    | 82[16400]                                    | 11[2200]   | 88                                                                           |
| 3 <sup>e</sup> | NaO <sup>t</sup> Bu        | 5                                    | 81[16200]                                    | 6[1200]    | 93                                                                           |
| 4              | NaO <sup>t</sup> Bu        | CrCl <sub>3</sub> ·6H <sub>2</sub> O | 79±2[15800]                                  | 12±1[2400] | 86                                                                           |
| 5 <sup>d</sup> | NaO <sup>t</sup> Bu        | CrCl <sub>3</sub> ·6H <sub>2</sub> O | 83[16600]                                    | 9[1800]    | 90                                                                           |
| 6 <sup>e</sup> | NaO <sup>t</sup> Bu        | CrCl <sub>3</sub> ·6H <sub>2</sub> O | 80[16000]                                    | 6[1200]    | 93                                                                           |

<sup>a</sup>Conditions: Benzyl alcohol (2 mmol), 1-phenyl ethanol (2 mmol), base (5 mol%), and Cr catalyst (Y mol%) were heated together in air at 140 °C for 3 hours. <sup>b</sup>Mol% of base and catalyst is with respect to total alcohol content (**1+2**). <sup>c</sup>Yield determined from <sup>1</sup>H NMR analysis using toluene as an internal standard. Yields reported are the average of two runs. <sup>d</sup>Result obtained from heating the filtrate for 2.5 h post hot-filtration after 30 minutes of reaction. <sup>e</sup>Reaction performed in the presence of excess mercury. <sup>f</sup>TON are written in the parenthesis.

## 2. HRMS analysis:

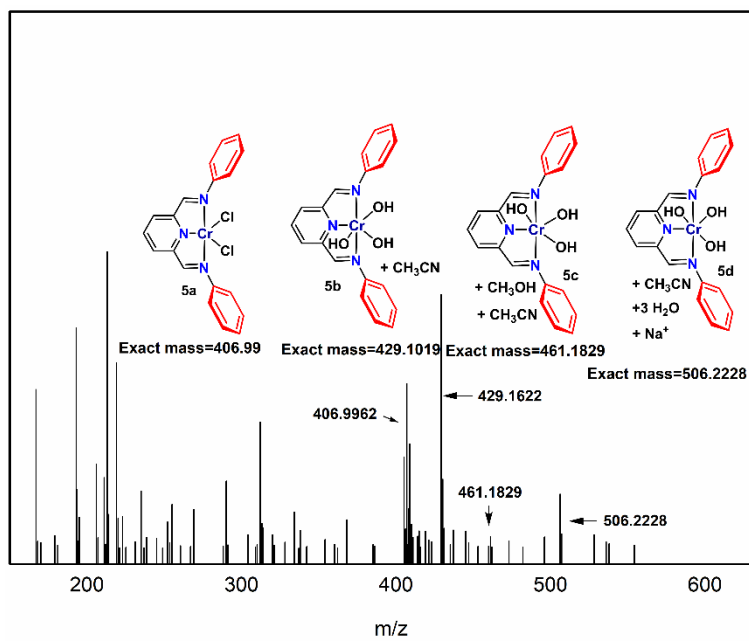

Figure S1. HRMS (ESI) plot of complex 5.

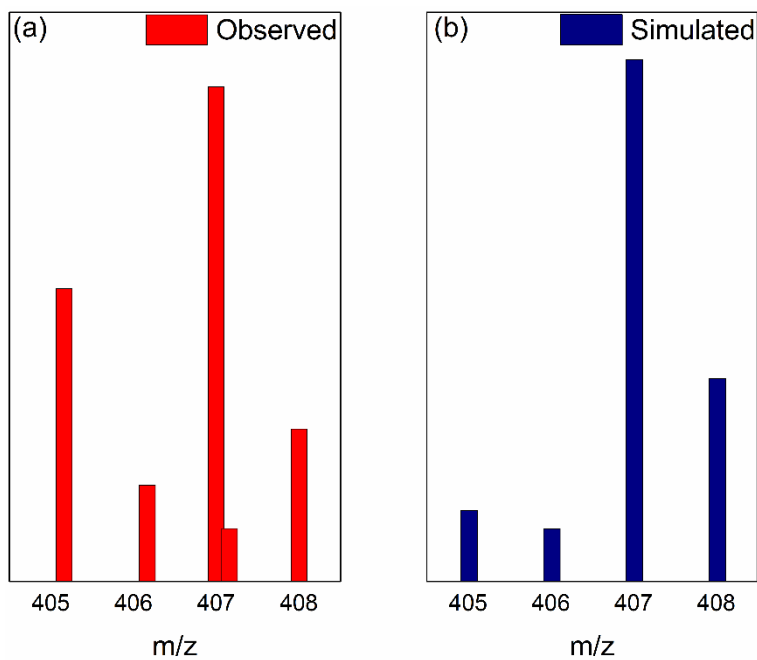

Figure S2. HRMS (ESI) expanded spectra of  $m/z$  406.9962 (a) Observed (b) Simulated.

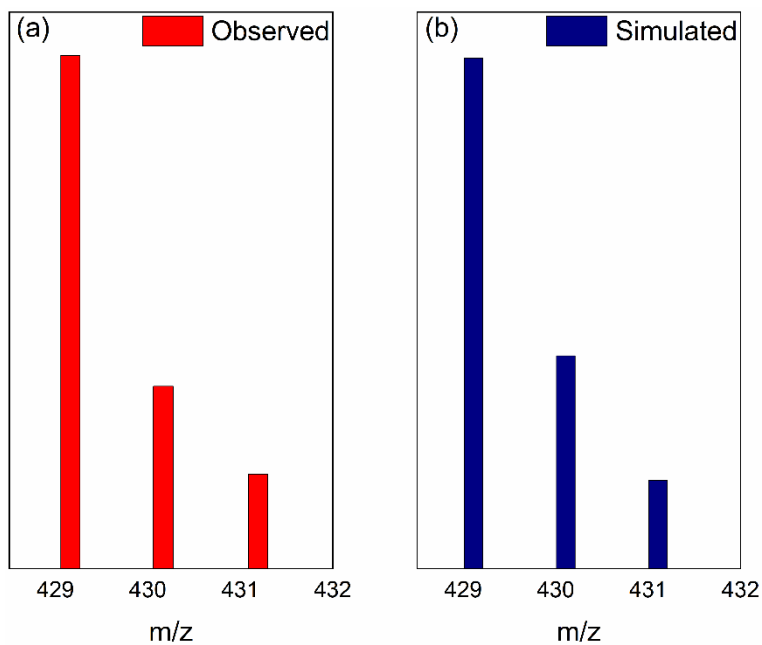

**Figure S3.** HRMS (ESI) expanded spectra of m/z 429.1622 (a) Observed (b) Simulated.

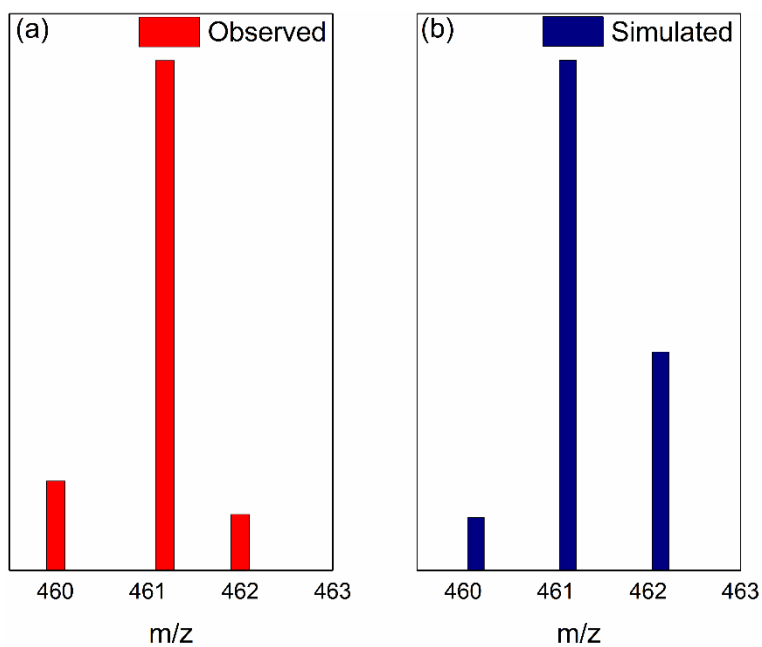

**Figure S4.** HRMS (ESI) expanded spectra of m/z 461.1829 (a) Observed (b) Simulated.

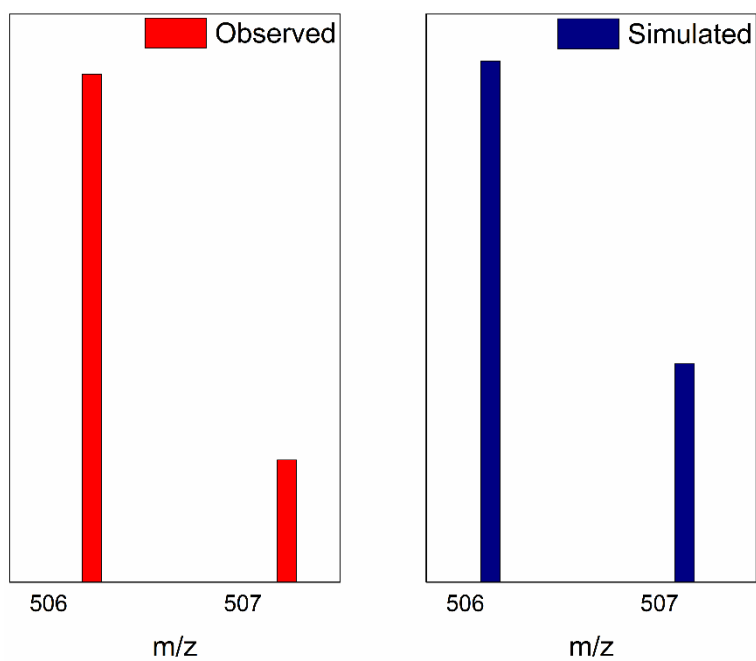

**Figure S5.** HRMS (ESI) expanded spectra of m/z 506.2228 (a) Observed (b) Simulated.

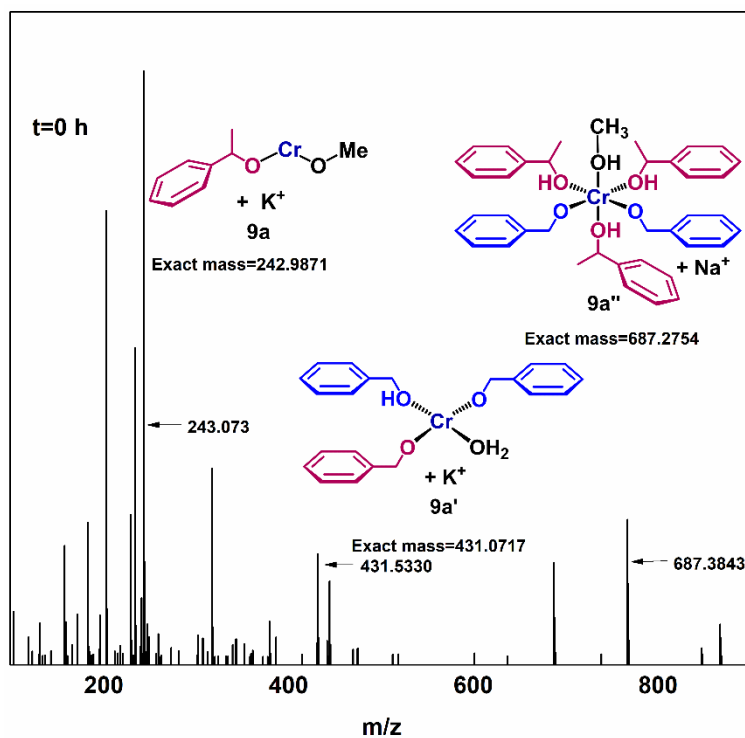

**Figure S6.** HRMS (ESI) plot of the reaction mixture containing **1** (4 mmol) and **2** (4 mmol) in the presence of 5 mol%  $\text{CrCl}_3 \cdot 6\text{H}_2\text{O}$  and 5 mol%  $\text{NaO}^t\text{Bu}$  at  $t = 0$  h at  $140^\circ\text{C}$ .

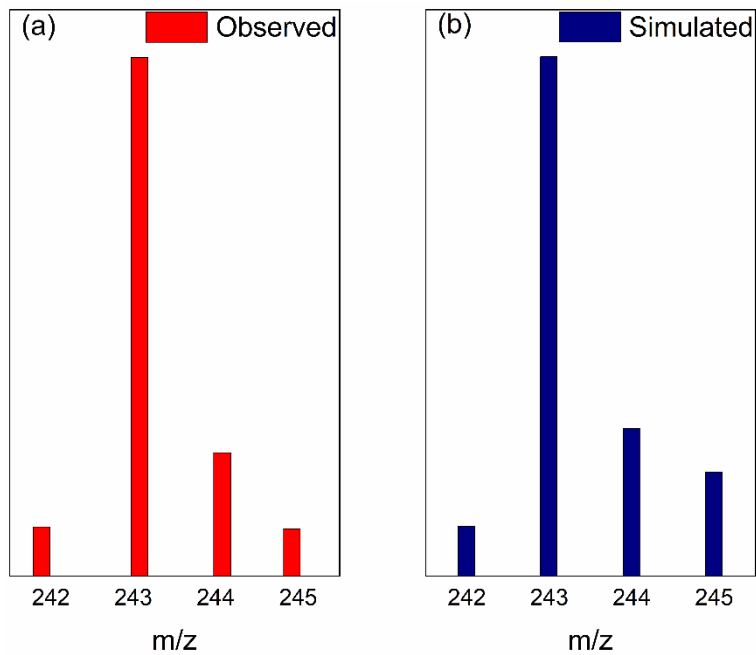

**Figure S7.** HRMS (ESI) expanded spectra of m/z 243.073 (a) Observed (b) Simulated.

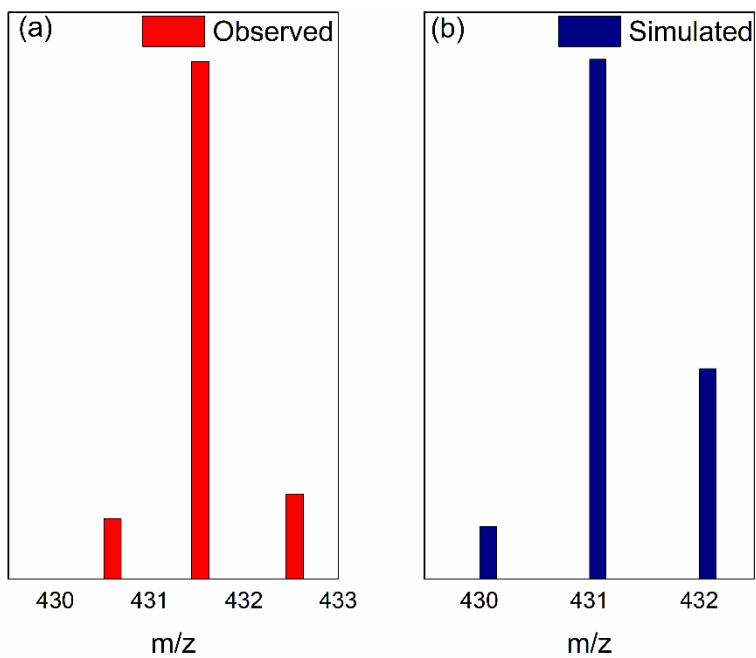

**Figure S8.** HRMS (ESI) expanded spectra of m/z 431.5330 (a) Observed (b) Simulated.





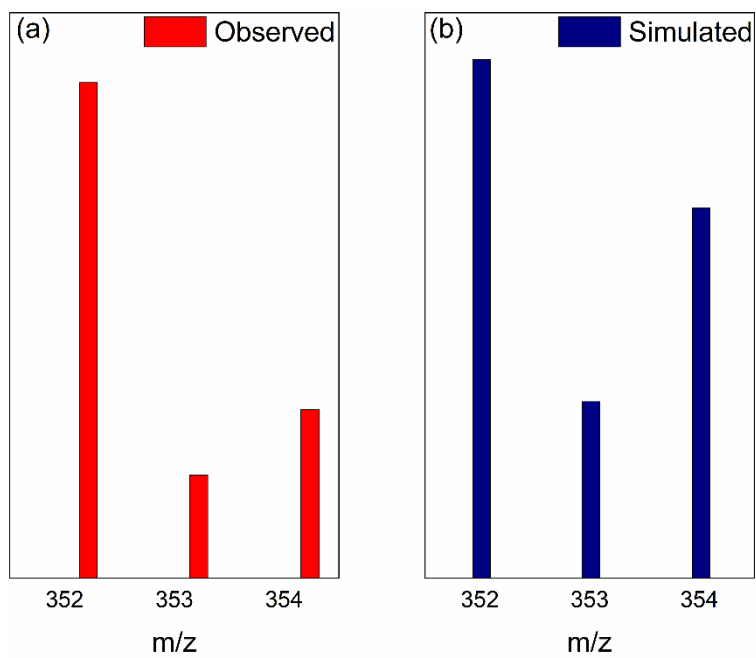

**Figure S11.** HRMS (ESI) expanded spectra of m/z 352.2153 (a) Observed (b) Simulated.

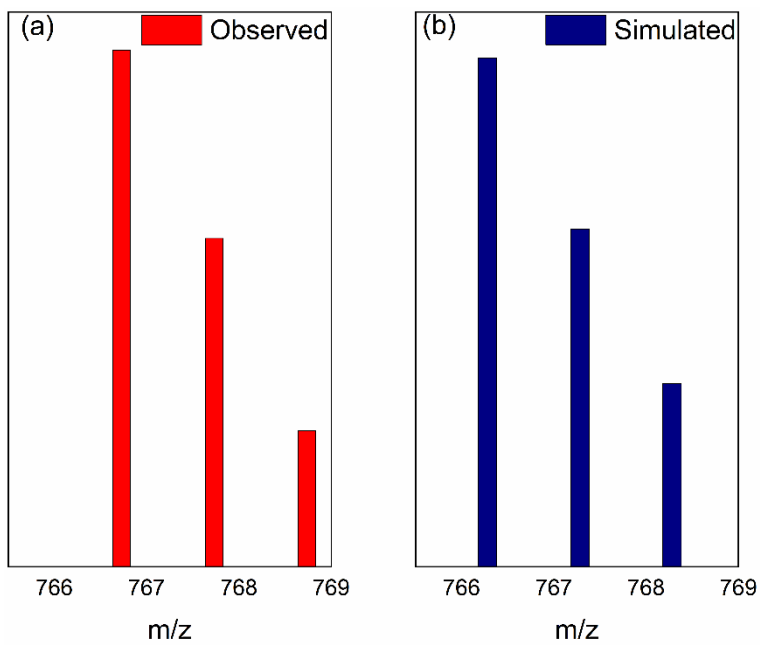

**Figure S12.** HRMS (ESI) expanded spectra of m/z 766.2749 (a) Observed (b) Simulated.

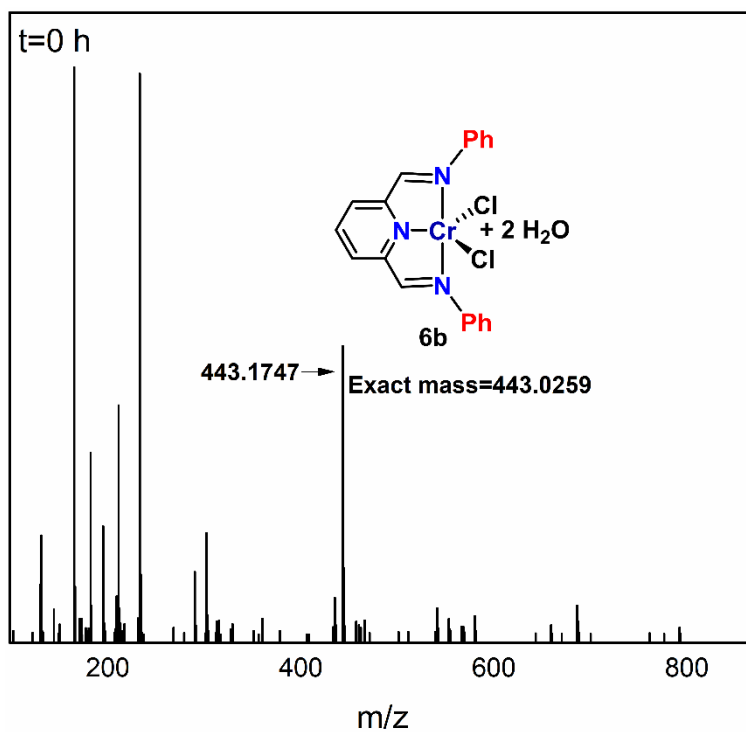

**Figure S13.** HRMS (ESI) plot of the reaction mixture containing **1** (4 mmol) and **2** (4 mmol) in the presence of 5 mol% **5** and 5 mol% NaO<sup>t</sup>Bu at t = 0 h at 140 °C.

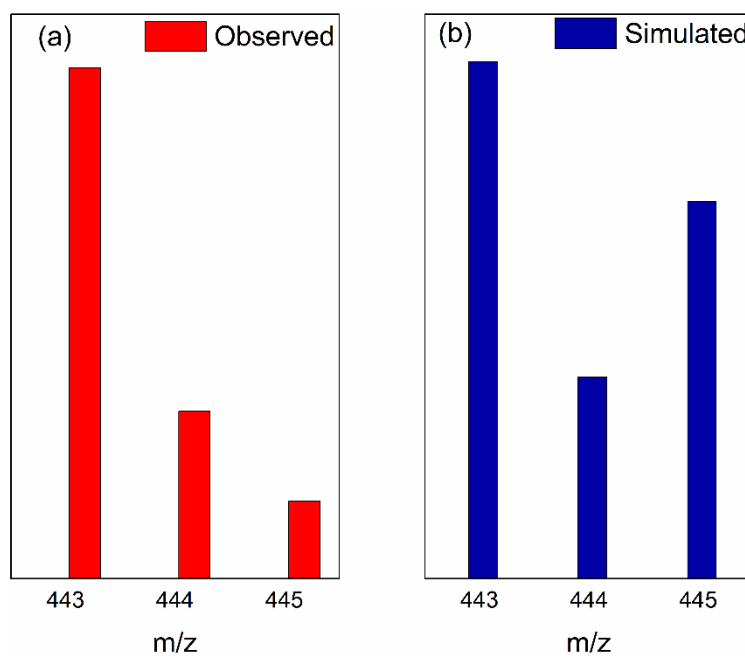

**Figure S14.** HRMS (ESI) expanded spectra of m/z 443.1747 (a) Observed (b) Simulated.

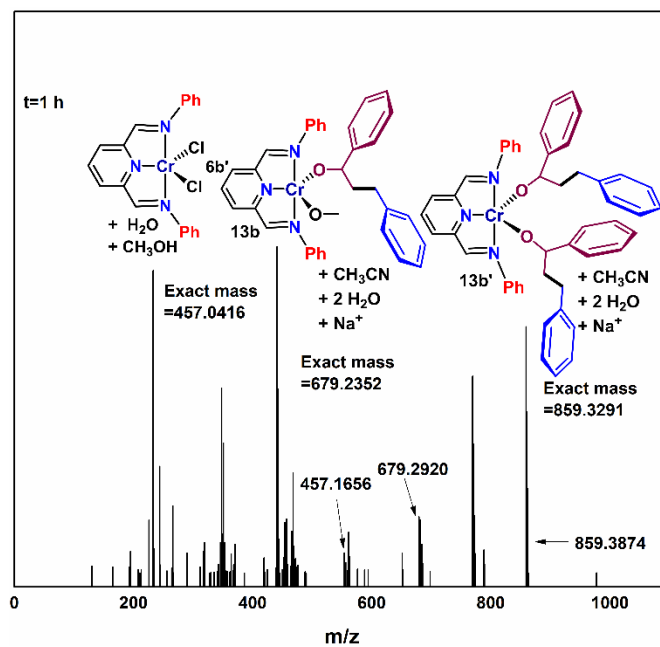

**Figure S15.** HRMS (ESI) plot of the reaction mixture containing **1** (4 mmol) and **2** (4 mmol) in the presence of 5 mol% **5** and 5 mol% NaO<sup>t</sup>Bu at t = 1 h at 140 °C.

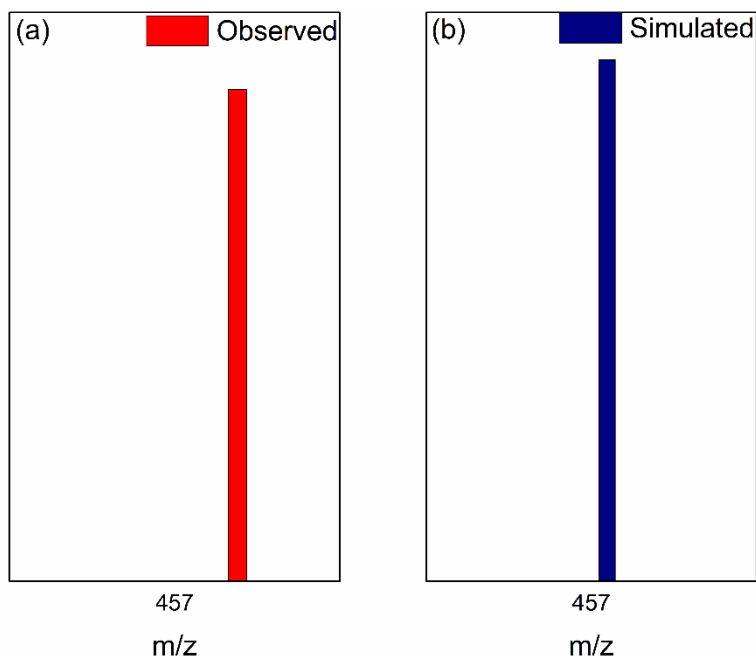

**Figure S16.** HRMS (ESI) expanded spectra of m/z 457.1656 (a) Observed (b) Simulated.

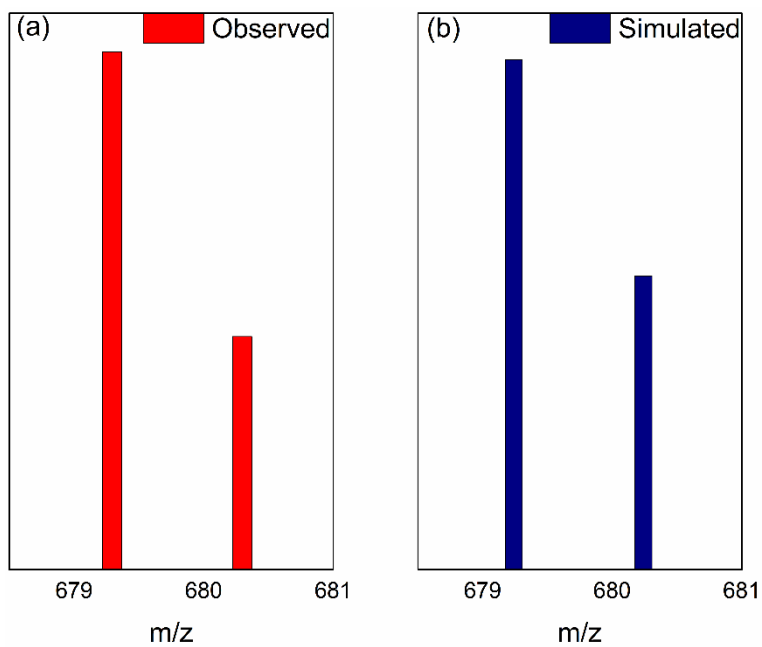

**Figure S17.** HRMS (ESI) expanded spectra of m/z 679.2920 (a) Observed (b) Simulated.

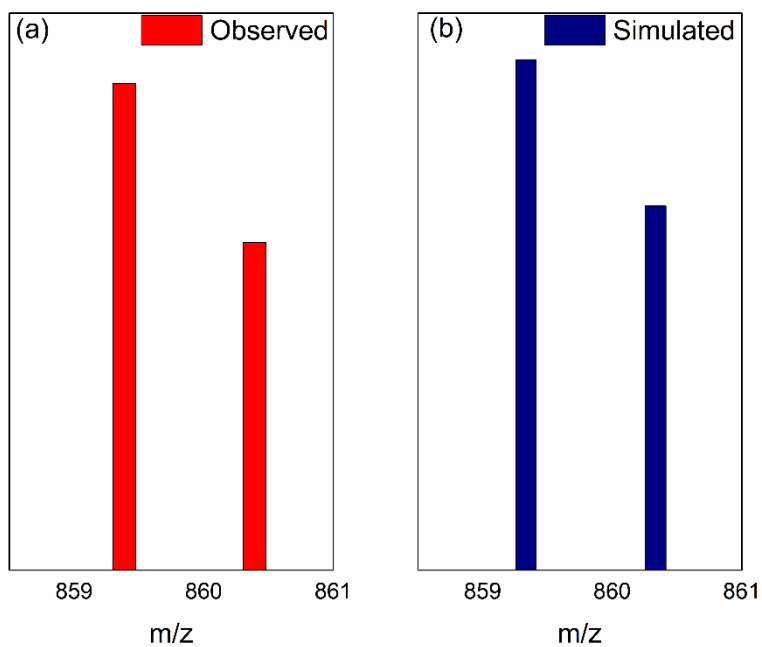

**Figure S18.** HRMS (ESI) expanded spectra of m/z 859.3874 (a) Observed (b) Simulated.

### 3. Gas Chromatography Analysis:

GC analysis (TCD detection) was performed on an Agilent 7820-GC instrument fitted with Agilent Front SSZ Inlet N2 HP-PLOT Q column (30 m length x 530  $\mu\text{m}$  x 40  $\mu\text{m}$ ) using the following method:

Agilent 7820-GC back detector TCD

Oven temperature: 50  $^{\circ}\text{C}$

Time at starting temp: 0 min

Hold time = 10 min

Inlet temperature: 100  $^{\circ}\text{C}$

Detector temperature (TCD): 250  $^{\circ}\text{C}$

Detector temperature (FID): 300  $^{\circ}\text{C}$

Flow rate (carrier): 5 mL/min (N<sub>2</sub>)

Split ratio: 10

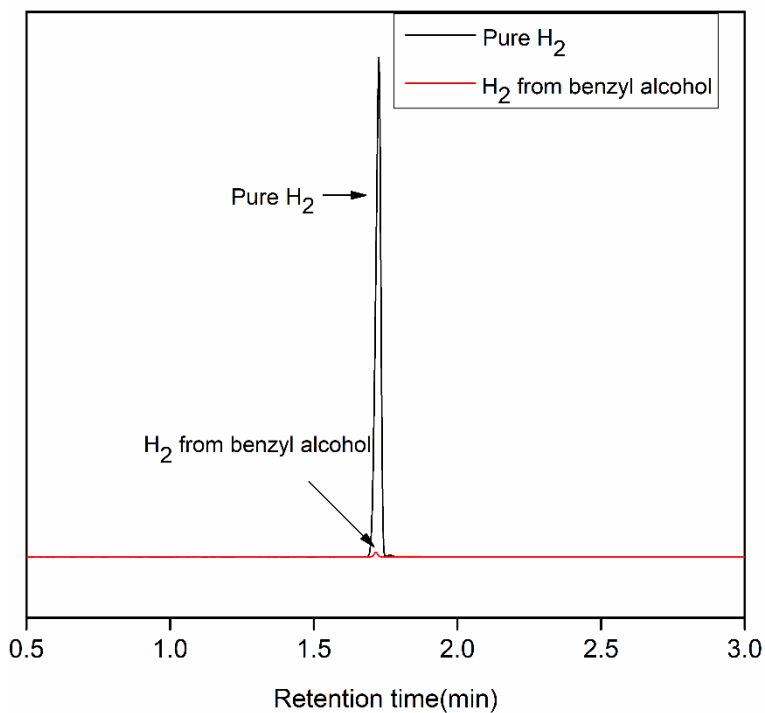

**Figure S19:** Evidence for H<sub>2</sub> evolution in the dehydrogenation of benzyl alcohol (**1**) catalyzed by **5** (0.01 mol %) and NaO<sup>t</sup>Bu (10 mol%) at 140  $^{\circ}\text{C}$  via GC analysis.

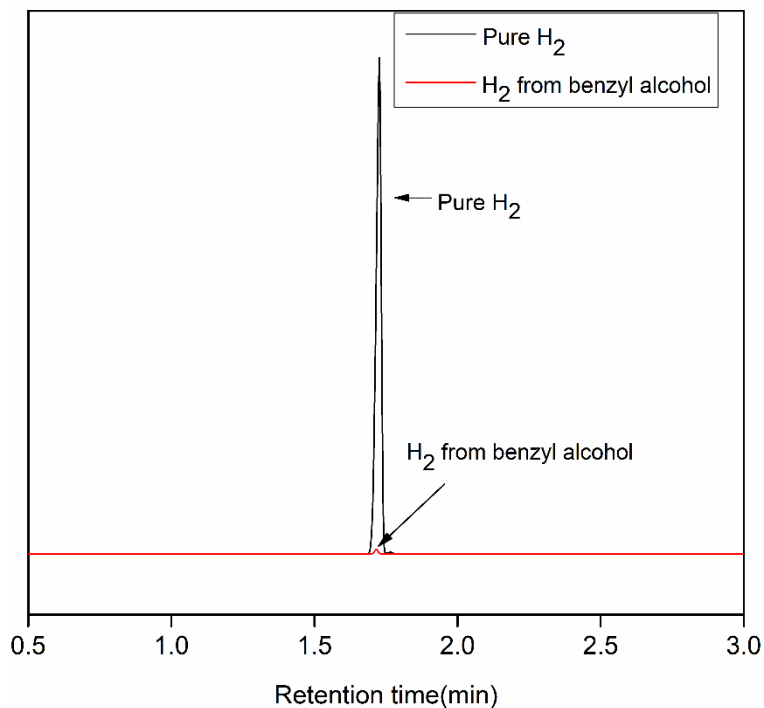

**Figure S20:** Evidence for H<sub>2</sub> evolution in the dehydrogenation of benzyl alcohol (**1**) catalyzed by CrCl<sub>3</sub>·6H<sub>2</sub>O (0.01 mol %) and NaO<sup>t</sup>Bu (10 mol%) at 140 °C via GC analysis.

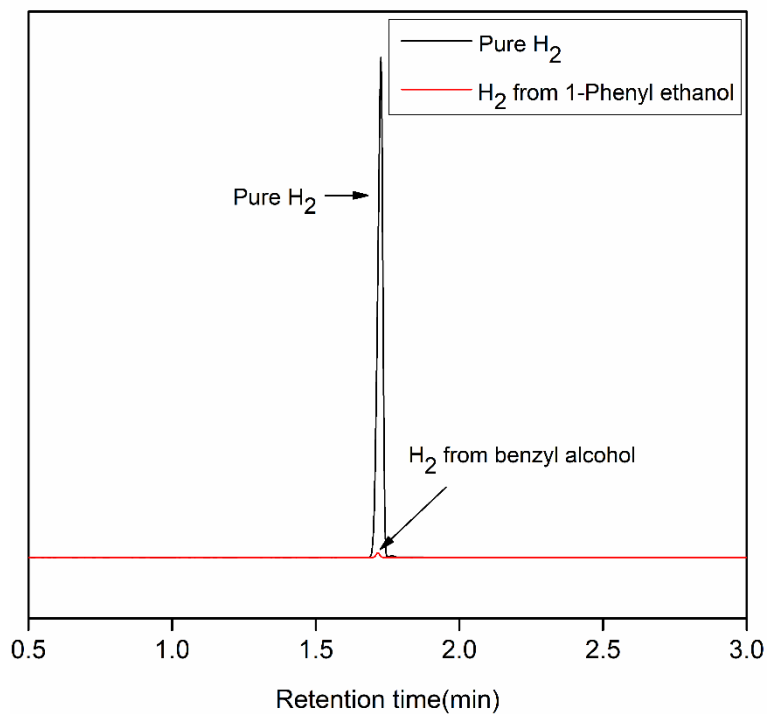

**Figure S21:** Evidence for H<sub>2</sub> evolution in the dehydrogenation of 1-Phenyl ethanol (**2**) catalyzed by **5** (0.01 mol %) and NaO<sup>t</sup>Bu (10 mol%) at 140 °C via GC analysis.

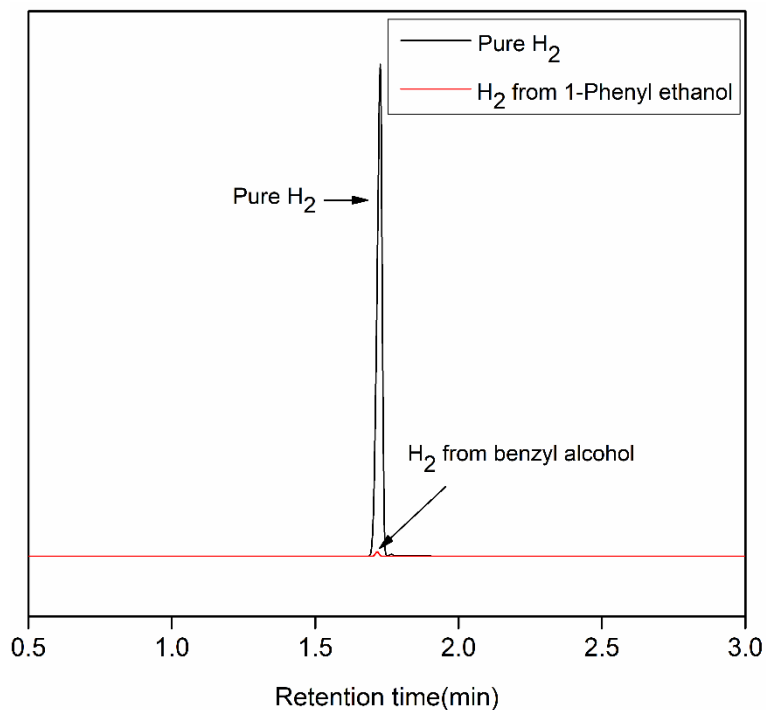

**Figure S22:** Evidence for H<sub>2</sub> evolution in the dehydrogenation of 1-Phenyl ethanol (**2**) catalyzed by CrCl<sub>3</sub>·6H<sub>2</sub>O (0.01 mol %) and NaO<sup>t</sup>Bu (10 mol%) at 140 °C via GC analysis.

#### 4. EPR analysis:

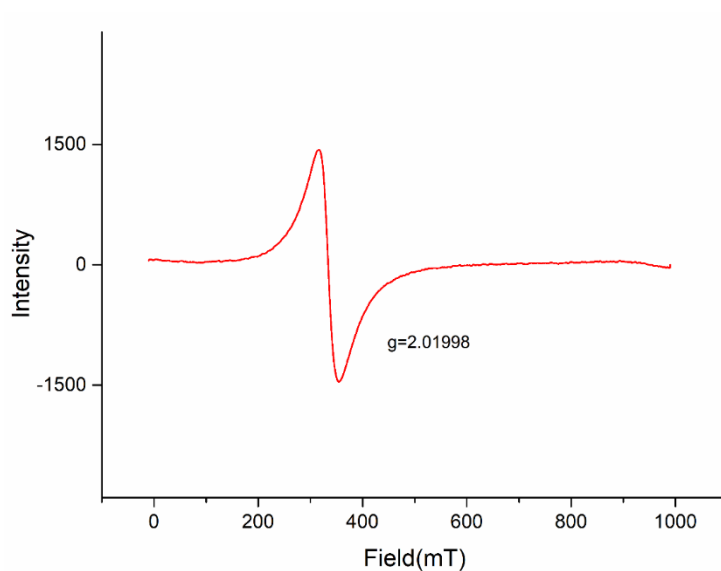

**Figure S23.** The X-band EPR spectra of the complex **5** recorded on a JES-FA200 ESR spectrometer at room temperature with microwave power of 0.998 mW and microwave frequency of 9.14 GHz.



## 5. NMR Data and Spectra:

### 1,3-diphenylpropan-1-ol (4a):

$^1\text{H}$  NMR (500 MHz,  $\text{CDCl}_3$ ):  $\delta$  7.26 (d,  $J = 4.3$  Hz, 4H), 7.18 (q,  $J = 6.0$  Hz, 3H), 7.10 (d,  $J = 7.5$  Hz, 3H), 4.60 (t,  $J = 6.4$  Hz, 1H), 2.62-2.55 (m, 2H), 2.10 – 1.89 (m, 2H), 1.80 (s, 1H).  $^{13}\text{C}\{^1\text{H}\}$  NMR (126 MHz,  $\text{CDCl}_3$ ):  $\delta$  144.70, 141.92, 128.66, 127.79, 126.00, 74.04, 40.60, 32.20.

### 1-(3-methoxyphenyl)-3-phenylpropan-1-ol(4b):

$^1\text{H}$  NMR (500 MHz,  $\text{CDCl}_3$ ):  $\delta$  7.33 – 7.18 (m, 6H), 6.94 (d,  $J = 6.5$  Hz, 2H), 6.84 (d,  $J = 8.0$  Hz, 1H), 4.69 (s, 1H), 3.83 (s, 3H), 2.80-2.66 (m, 2H), 2.19 – 2.00 (m, 2H), 1.92 (s, 1H).  $^{13}\text{C}\{^1\text{H}\}$  NMR (151 MHz,  $\text{CDCl}_3$ ):  $\delta$  146.43, 141.89, 129.68, 128.52, 125.99, 118.36, 113.22, 111.52, 73.95, 55.37, 40.53, 32.17.

### 1-(4-(tert-butyl)phenyl)-3-phenylpropan-1-ol(4d):

$^1\text{H}$  NMR (500 MHz,  $\text{CDCl}_3$ ):  $\delta$  7.37 (d,  $J = 8.2$  Hz, 2H), 7.26 (dd,  $J = 15.2, 7.2$  Hz, 4H), 7.18 (dd,  $J = 13.2, 7.2$  Hz, 3H), 4.66 (t,  $J = 7.8$  Hz, 1H), 2.80 – 2.63 (m, 2H), 2.18 – 1.99 (m, 2H), 1.85 (d,  $J = 2.9$  Hz, 1H), 1.32 (s, 9H).  $^{13}\text{C}\{^1\text{H}\}$  NMR (126 MHz,  $\text{CDCl}_3$ ):  $\delta$  150.76, 142.01, 141.68, 128.57, 128.49, 125.94, 125.81, 125.55, 73.82, 40.39, 34.66, 32.27, 31.49.

### 3-phenyl-1-(thiophen-2-yl)propan-1-ol(4f):

$^1\text{H}$  NMR (600 MHz,  $\text{CDCl}_3$ ):  $\delta$  7.34 – 7.30 (m, 2H), 7.30 – 7.28 (m, 1H), 7.24 (d,  $J = 7.9$  Hz, 3H), 7.02 – 6.99 (m, 2H), 4.99 – 4.93 (m, 1H), 2.84 – 2.71 (m, 2H), 2.30 – 2.15 (m, 2H), 2.05 (d,  $J = 4.2$  Hz, 1H).  $^{13}\text{C}\{^1\text{H}\}$  NMR (151 MHz,  $\text{CDCl}_3$ ):  $\delta$  148.62, 141.57, 128.57, 126.09, 124.83, 124.07, 69.65, 40.82, 32.14.

### 1-(4-chlorophenyl)-3-phenylpropan-1-ol (4g):

$^1\text{H}$  NMR (500 MHz,  $\text{CDCl}_3$ ):  $\delta$  7.32 (d,  $J = 8.6$  Hz, 2H), 7.30 – 7.25 (m, 4H), 7.21 – 7.17 (m, 3H), 4.67 (ddd,  $J = 8.3, 5.1, 3.3$  Hz, 1H), 2.76-2.63 (m, 2H), 2.14 – 1.95 (m, 2H), 1.88 (d,  $J = 3.5$  Hz, 1H).  $^{13}\text{C}\{^1\text{H}\}$  NMR (126 MHz,  $\text{CDCl}_3$ ):  $\delta$  143.16, 141.62, 133.40, 128.78, 128.59, 128.55, 127.44, 126.10, 73.30, 40.64, 32.06.

### 1-(3-chlorophenyl)-3-phenylpropan-1-ol(4i):

$^1\text{H}$  NMR (600 MHz,  $\text{CDCl}_3$ ):  $\delta$  7.38 (s, 1H), 7.34 – 7.26 (m, 4H), 7.23 (dd,  $J = 13.4, 8.0$  Hz, 4H), 4.69 (dt,  $J = 8.0, 4.1$  Hz, 1H), 2.80-2.68 (m, 2H), 2.16 – 2.00 (m, 2H), 1.98 (d,  $J = 3.3$  Hz, 1H).

**1-(3-bromophenyl)-3-phenylpropan-1-ol(4j):**

$^1\text{H}$  NMR (600 MHz,  $\text{CDCl}_3$ ):  $\delta$  7.54 (s, 1H), 7.43 (d,  $J = 7.8$  Hz, 1H), 7.34 – 7.27 (m, 3H), 7.26 – 7.20 (m, 4H), 4.68 (dt,  $J = 8.2, 4.4$  Hz, 1H), 2.81 – 2.67 (m, 2H), 2.16 – 1.97 (m, 3H).  $^{13}\text{C}\{^1\text{H}\}$  NMR (151 MHz,  $\text{CDCl}_3$ ):  $\delta$  147.07, 141.55, 130.77, 130.22, 129.15, 128.59, 128.55, 126.11, 124.63, 122.77, 73.26, 40.61, 32.03.

**3-phenyl-1-(p-tolyl)propan-1-ol(4l):**

$^1\text{H}$  NMR (600 MHz,  $\text{CDCl}_3$ ):  $\delta$  7.31 (t,  $J = 7.6$  Hz, 2H), 7.28 (d,  $J = 8.0$  Hz, 2H), 7.21 (dd,  $J = 16.2, 7.7$  Hz, 5H), 4.68 (t,  $J = 5.2$  Hz, 1H), 2.80 – 2.66 (m, 2H), 2.39 (s, 3H), 2.20 – 2.02 (m, 2H), 1.91 (s, 1H).  $^{13}\text{C}\{^1\text{H}\}$  NMR (151 MHz,  $\text{CDCl}_3$ ):  $\delta$  141.97, 141.69, 137.45, 129.31, 128.56, 128.49, 126.02, 125.94, 73.85, 40.47, 32.21, 21.24.

**3-phenyl-1-(4-(trifluoromethyl)phenyl)propan-1-ol(4m):**

$^1\text{H}$  NMR (600 MHz,  $\text{CDCl}_3$ ):  $\delta$  7.61 (d,  $J = 8.1$  Hz, 2H), 7.46 (d,  $J = 8.2$  Hz, 2H), 7.30 (t,  $J = 7.6$  Hz, 2H), 7.20 (t,  $J = 8.1$  Hz, 3H), 4.76 (dt,  $J = 8.1, 4.3$  Hz, 1H), 2.79 – 2.67 (m, 2H), 2.15 – 2.00 (m, 3H).  $^{13}\text{C}\{^1\text{H}\}$  NMR (151 MHz,  $\text{CDCl}_3$ ):  $\delta$  148.65, 141.45, 128.63, 128.54, 126.29, 126.17, 125.61, 125.58, 125.56, 125.53, 73.29, 40.69, 31.97.

**1-(naphthalen-2-yl)-3-phenylpropan-1-ol(4p):**

$^1\text{H}$  NMR (600 MHz,  $\text{CDCl}_3$ ):  $\delta$  7.88 – 7.77 (m, 4H), 7.59 – 7.48 (m, 3H), 7.39 – 7.21 (m, 5H), 4.89 (dt,  $J = 7.9, 3.1$  Hz, 1H), 2.82 – 2.70 (m, 2H), 2.30 – 2.15 (m, 2H), 2.03 (s, 1H).  $^{13}\text{C}\{^1\text{H}\}$  NMR (151 MHz,  $\text{CDCl}_3$ ):  $\delta$  142.01, 141.86, 133.41, 133.15, 128.59, 128.54, 128.52, 128.06, 127.83, 126.32, 126.01, 124.82, 124.17, 74.12, 40.46, 32.18.

**1-(4-methoxyphenyl)-3-phenylpropan-1-ol(4q):**

$^1\text{H}$  NMR (600 MHz,  $\text{CDCl}_3$ ):  $\delta$  7.32 – 7.28 (m, 4H), 7.21 (d,  $J = 7.1$  Hz, 3H), 6.92 (d,  $J = 8.7$  Hz, 2H), 4.66 (t,  $J = 6.6$  Hz, 1H), 3.83 (s, 3H), 2.76 – 2.64 (m, 2H), 2.20 – 2.00 (m, 2H), 1.86 (s, 1H).  $^{13}\text{C}\{^1\text{H}\}$  NMR (151 MHz,  $\text{CDCl}_3$ ):  $\delta$  159.24, 141.95, 136.80, 128.56, 127.34, 125.96, 114.02, 73.63, 55.42, 40.46, 32.25.

**3-(3-methoxyphenyl)-1-phenylpropan-1-ol (4r):**

$^1\text{H}$  NMR (500 MHz,  $\text{CDCl}_3$ ):  $\delta$  7.25 – 7.06 (m, 6H), 6.70 – 6.61 (m, 3H), 4.57 – 4.51 (m, 1H), 3.66 (s, 3H), 2.65 – 2.48 (m, 2H), 2.14 (s, 1H), 1.95 (dtd,  $J = 49.6, 14.1, 7.3$  Hz, 2H).  $^{13}\text{C}\{^1\text{H}\}$  NMR (126 MHz,  $\text{CDCl}_3$ ):  $\delta$  159.68, 143.52, 129.38, 128.52, 127.63, 125.97, 120.93, 114.26, 111.24, 77.09, 76.90, 73.82, 55.16, 40.37, 32.14.

**1-phenyl-3-(m-tolyl)propan-1-ol (4s):**

$^1\text{H}$  NMR (600 MHz,  $\text{CDCl}_3$ ):  $\delta$  7.36 (d,  $J = 4.3$  Hz, 4H), 7.32 – 7.27 (m, 1H), 7.17 (t,  $J = 7.4$  Hz, 1H), 7.03 – 6.98 (m, 3H), 4.72 – 4.68 (m, 1H), 2.75–2.61 (m, 2H), 2.32 (s, 3H), 2.16 – 2.00 (m, 3H), 1.85 (s, 1H).  $^{13}\text{C}\{^1\text{H}\}$  NMR (151 MHz,  $\text{CDCl}_3$ ):  $\delta$  144.71, 141.83, 138.08, 129.39, 128.65, 128.42, 127.77, 126.73, 126.06, 125.56, 74.10, 40.63, 32.12, 21.53.

**1-phenyl-3-(pyridin-3-yl)propan-1-ol(4t):**

$^1\text{H}$  NMR (600 MHz,  $\text{CDCl}_3$ ):  $\delta$  8.43 – 8.38 (m, 2H), 7.52 (dt,  $J = 7.9, 2.0$  Hz, 1H), 7.37 (d,  $J = 4.5$  Hz, 4H), 7.32 – 7.28 (m, 1H), 7.21 (dd,  $J = 7.8, 4.8$  Hz, 1H), 4.70 (dd,  $J = 8.0, 5.2$  Hz, 1H), 2.80–2.68 (m, 3H), 2.17–1.99 (m, 3H).  $^{13}\text{C}\{^1\text{H}\}$  NMR (151 MHz,  $\text{CDCl}_3$ ):  $\delta$  147.44, 144.72, 137.43, 136.21, 128.79, 127.94, 126.10, 73.59, 40.33, 29.39.

**3-(naphthalen-1-yl)-1-phenylpropan-1-ol(4u):**

$^1\text{H}$  NMR (600 MHz,  $\text{CDCl}_3$ ) :  $\delta$  8.02 – 7.99 (m, 1H), 7.89 – 7.85 (m, 1H), 7.74 (d,  $J = 8.1$  Hz, 1H), 7.53 – 7.47 (m, 3H), 7.43 – 7.35 (m, 6H), 7.34 – 7.30 (m, 1H), 4.83 (dt,  $J = 8.0, 4.2$  Hz, 1H), 3.31 – 3.10 (m, 2H), 2.32 – 2.15 (m, 2H), 1.96 (d,  $J = 3.3$  Hz, 1H).  $^{13}\text{C}\{^1\text{H}\}$  NMR (151 MHz,  $\text{CDCl}_3$ ):  $\delta$  144.65, 138.12, 134.04, 131.96, 128.89, 128.69, 127.85, 126.82, 126.09, 125.93, 125.68, 125.59, 123.91, 74.35, 39.98, 29.26.

**3-(3-chlorophenyl)-1-phenylpropan-1-ol(4z):**

$^1\text{H}$  NMR (600 MHz,  $\text{CDCl}_3$ ):  $\delta$  7.36 (d,  $J = 6.5$  Hz, 4H), 7.29 (ddd,  $J = 8.5, 5.8, 2.1$  Hz, 1H), 7.22 – 7.15 (m, 3H), 7.07 (dt,  $J = 7.4, 1.5$  Hz, 1H), 4.68 (t,  $J = 6.4$  Hz, 1H), 2.77 – 2.62 (m, 2H), 2.15 – 1.97 (m, 2H), 1.89 (s, 1H).  $^{13}\text{C}\{^1\text{H}\}$  NMR (151 MHz,  $\text{CDCl}_3$ ):  $\delta$  144.49, 143.99, 134.25, 129.75, 128.72, 127.91, 126.19, 126.00, 73.84, 40.30, 31.85.

**3-(4-chlorophenyl)-1-phenylpropan-1-ol(4zb):**

$^1\text{H}$  NMR (600 MHz,  $\text{CDCl}_3$ ):  $\delta$  7.41 – 7.35 (m, 4H), 7.32 (t,  $J = 7.6$  Hz, 1H), 7.29 – 7.25 (m, 2H), 7.14 (d,  $J = 8.3$  Hz, 2H), 4.70 (ddd,  $J = 8.2, 5.2, 3.4$  Hz, 1H), 2.78 – 2.63 (m, 2H), 2.17 – 1.98 (m, 2H), 1.90 (d,  $J = 3.3$  Hz, 1H).  $^{13}\text{C}\{^1\text{H}\}$  NMR (151 MHz,  $\text{CDCl}_3$ ):  $\delta$  144.53, 140.34, 131.69, 129.92, 128.71, 128.60, 127.89, 126.01, 73.85, 40.44, 31.51.

**1-phenyl-3-(p-tolyl)propan-1-ol(4ze):**

$^1\text{H}$  NMR (600 MHz,  $\text{CDCl}_3$ ):  $\delta$  7.40 – 7.35 (m, 4H), 7.30 (tt,  $J$  = 6.5, 3.0 Hz, 1H), 7.12 (s, 4H), 4.71 – 4.67 (m, 1H), 2.76 – 2.62 (m, 2H), 2.35 (s, 3H), 2.17 – 2.00 (m, 3H).  $^{13}\text{C}\{^1\text{H}\}$  NMR (151 MHz,  $\text{CDCl}_3$ ):  $\delta$  144.71, 135.38, 129.18, 128.60, 128.42, 127.70, 126.05, 73.98, 40.65, 21.10.

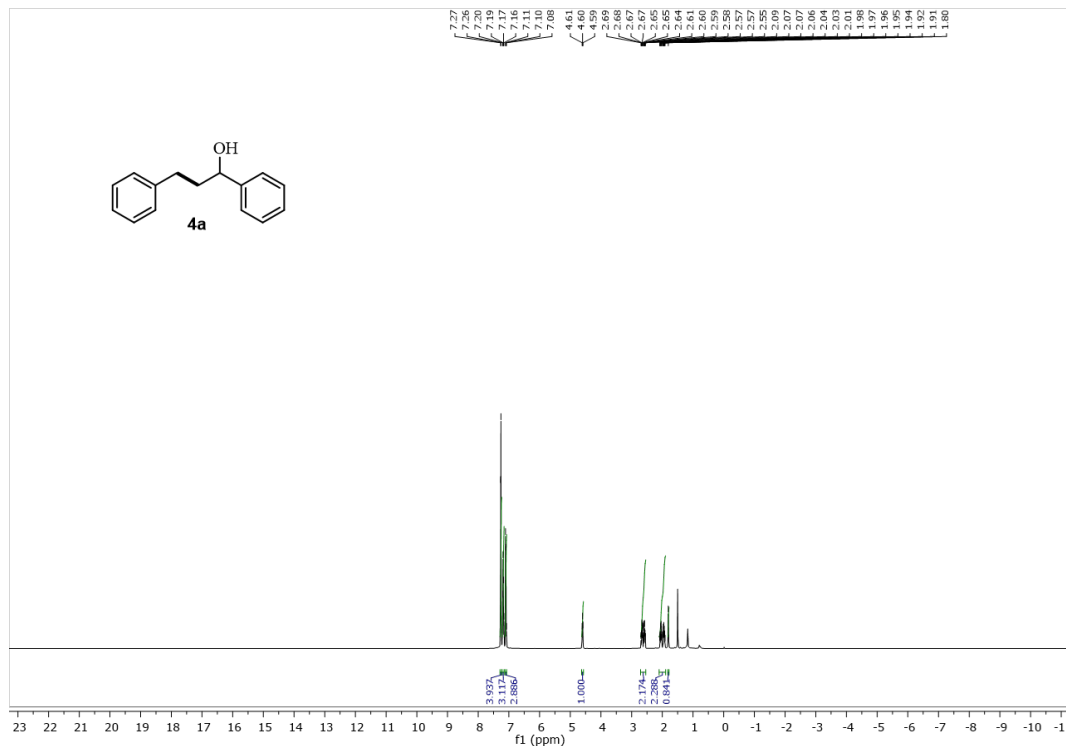

**Figure S24.**  $^1\text{H}$  NMR spectra of 1,3-diphenylpropan-1-ol (4a) recorded in  $\text{CDCl}_3$ .

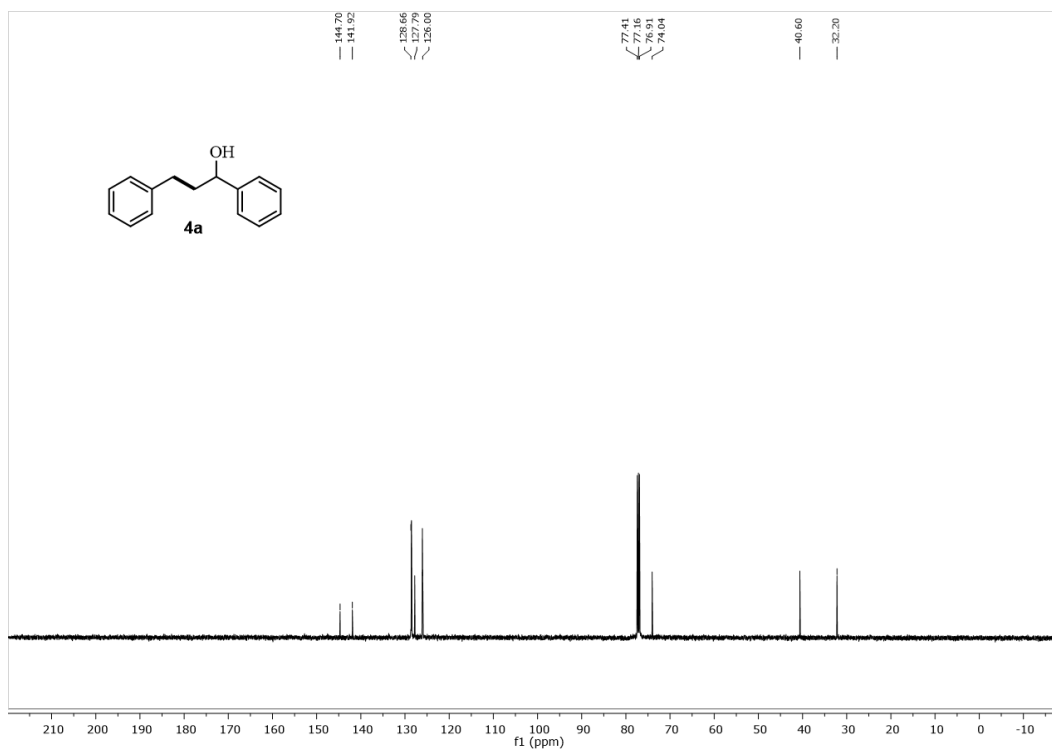

Figure S25.  $^{13}\text{C}\{^1\text{H}\}$  NMR spectra of 1,3-diphenylpropan-1-ol(**4a**) recorded in  $\text{CDCl}_3$ .

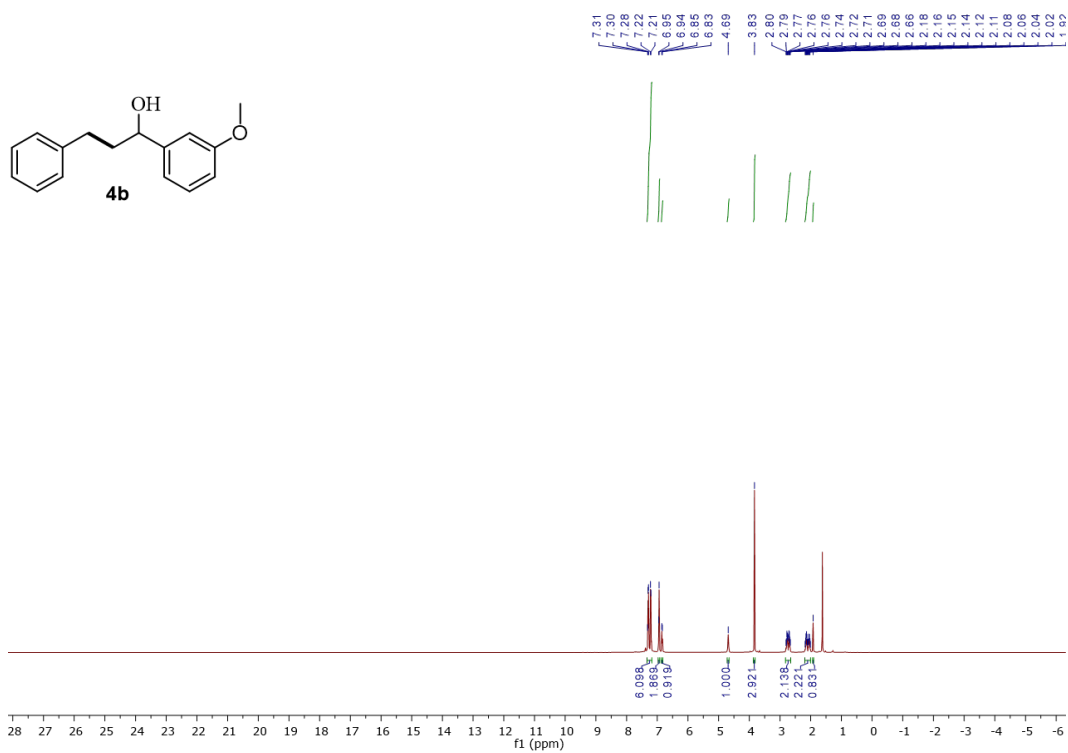

Figure S26:  $^1\text{H}$  NMR spectra of 1-(3-methoxyphenyl)-3-phenylpropan-1-ol(**4b**) recorded in  $\text{CDCl}_3$ .

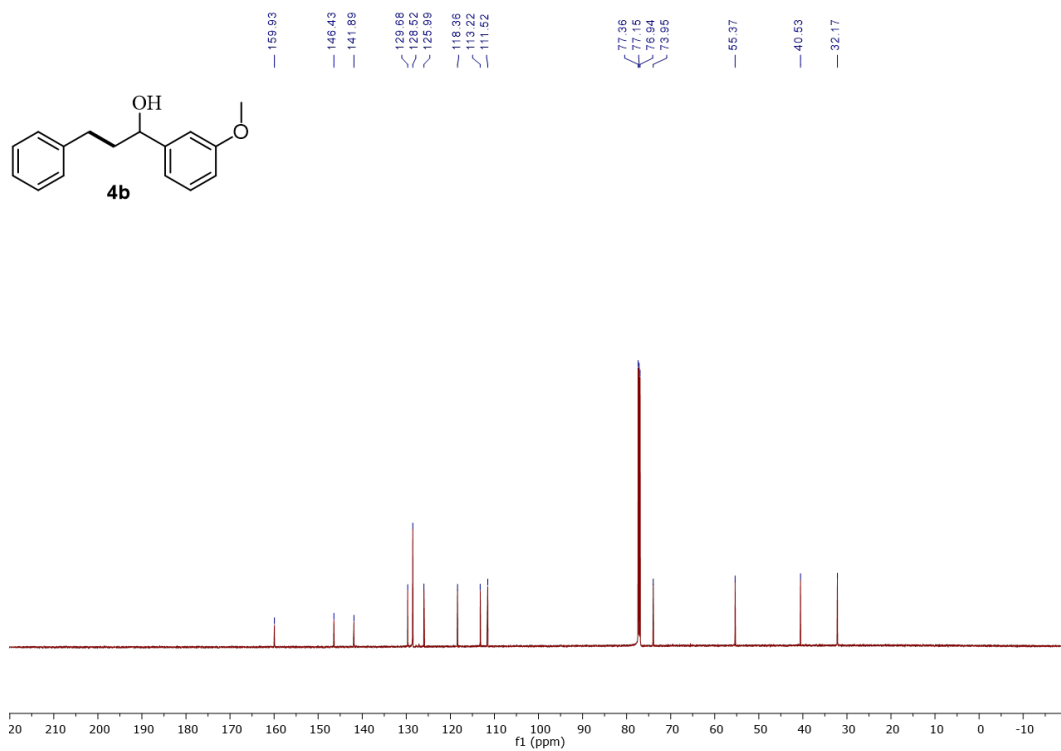

Figure S27:  $^{13}\text{C}\{^1\text{H}\}$  NMR spectra of 1-(3-methoxyphenyl)-3-phenylpropan-1-ol(**4b**) recorded in  $\text{CDCl}_3$ .

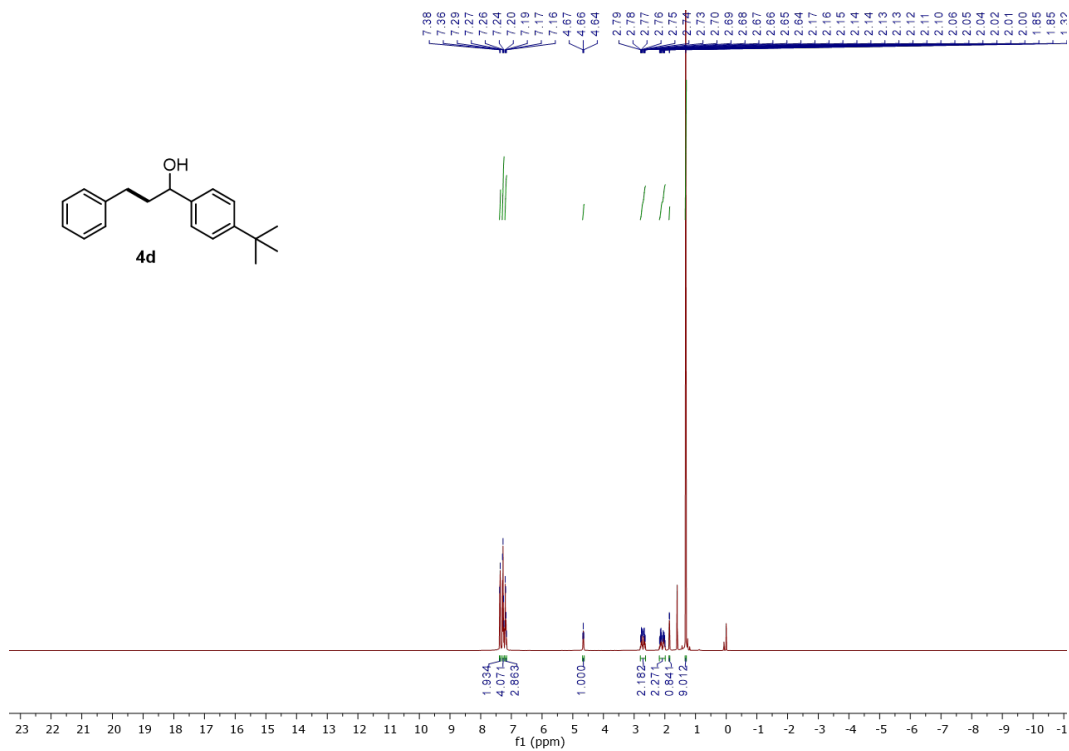

Figure S28:  $^1\text{H}$  NMR spectra of 1-(4-(tert-butyl)phenyl)-3-phenylpropan-1-ol(**4d**) recorded in  $\text{CDCl}_3$ .

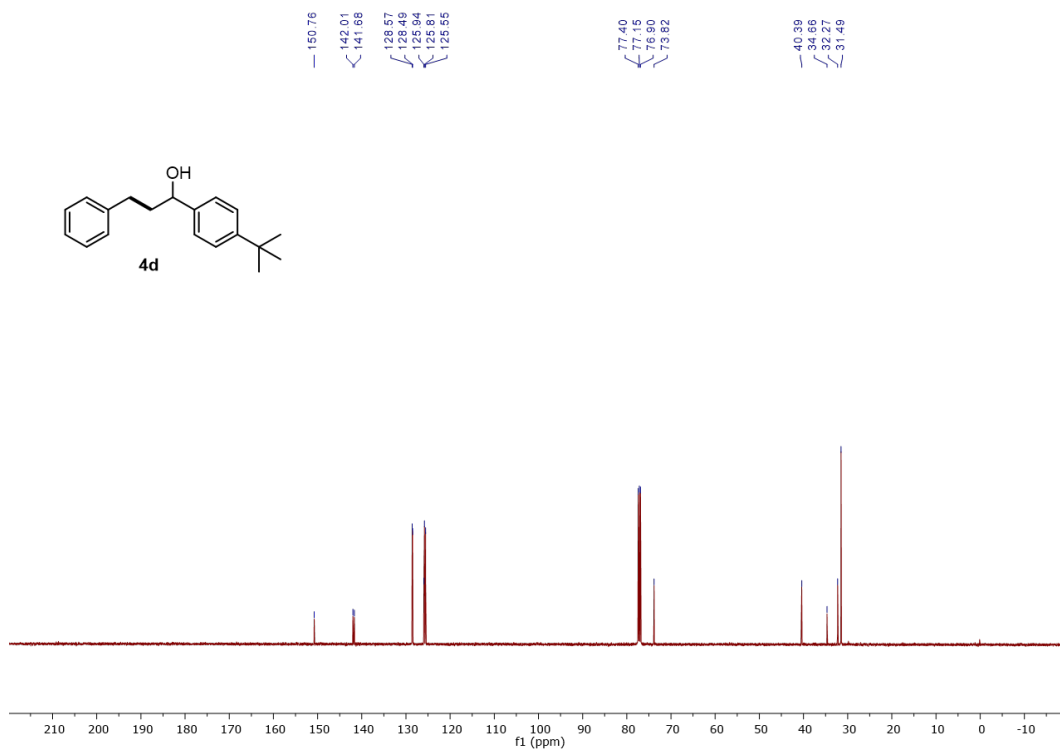

Figure S29:  $^{13}\text{C}\{^1\text{H}\}$  NMR spectra of 1-(4-(tert-butyl)phenyl)-3-phenylpropan-1-ol(**4d**) recorded in  $\text{CDCl}_3$ .

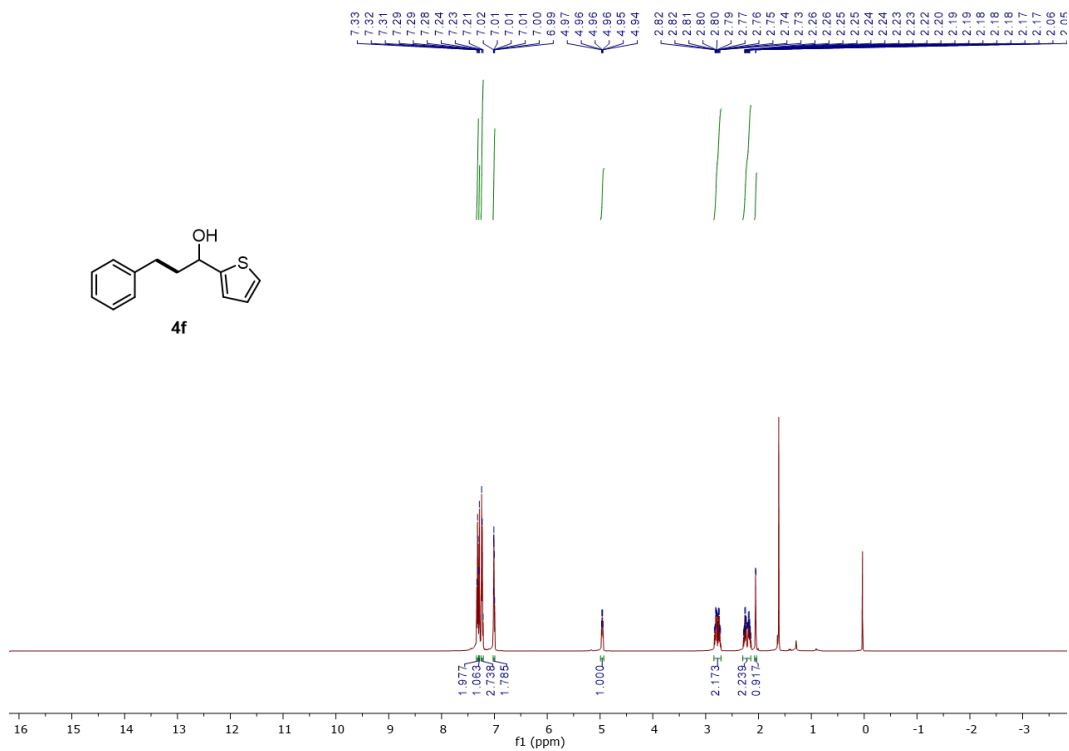

Figure S30:  $^1\text{H}$  NMR spectra of 3-phenyl-1-(thiophen-2-yl)propan-1-ol(**4f**) recorded in  $\text{CDCl}_3$ .

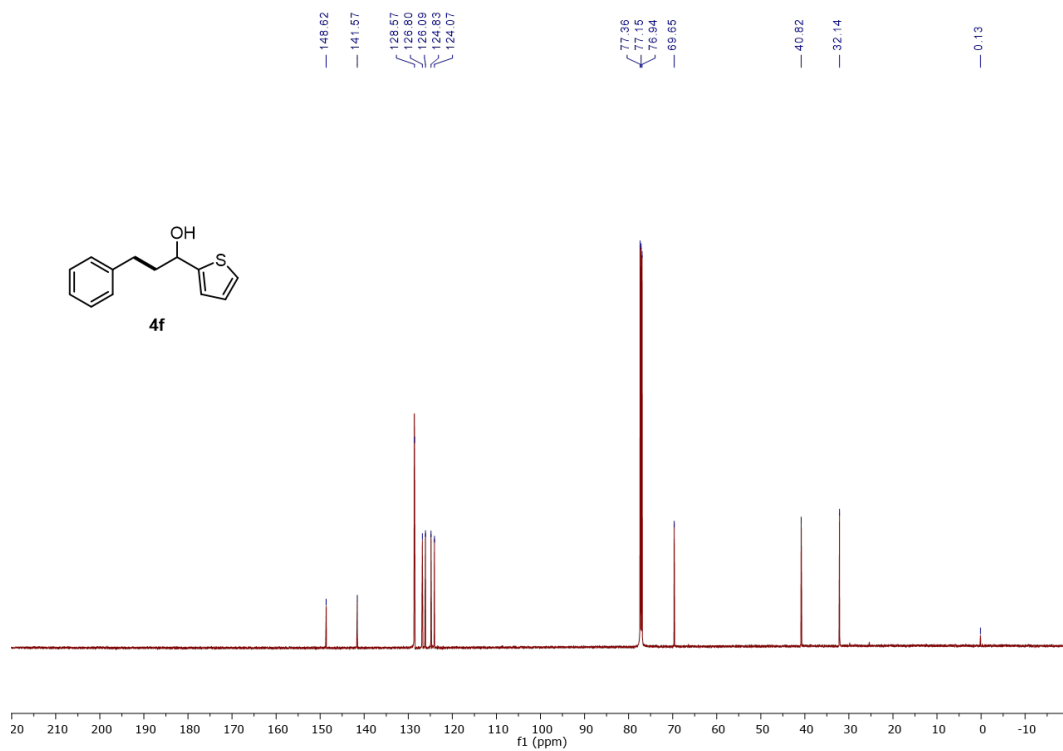

Figure S31:  $^{13}\text{C}\{^1\text{H}\}$  NMR spectra of 3-phenyl-1-(thiophen-2-yl)propan-1-ol(**4f**) recorded in  $\text{CDCl}_3$ .

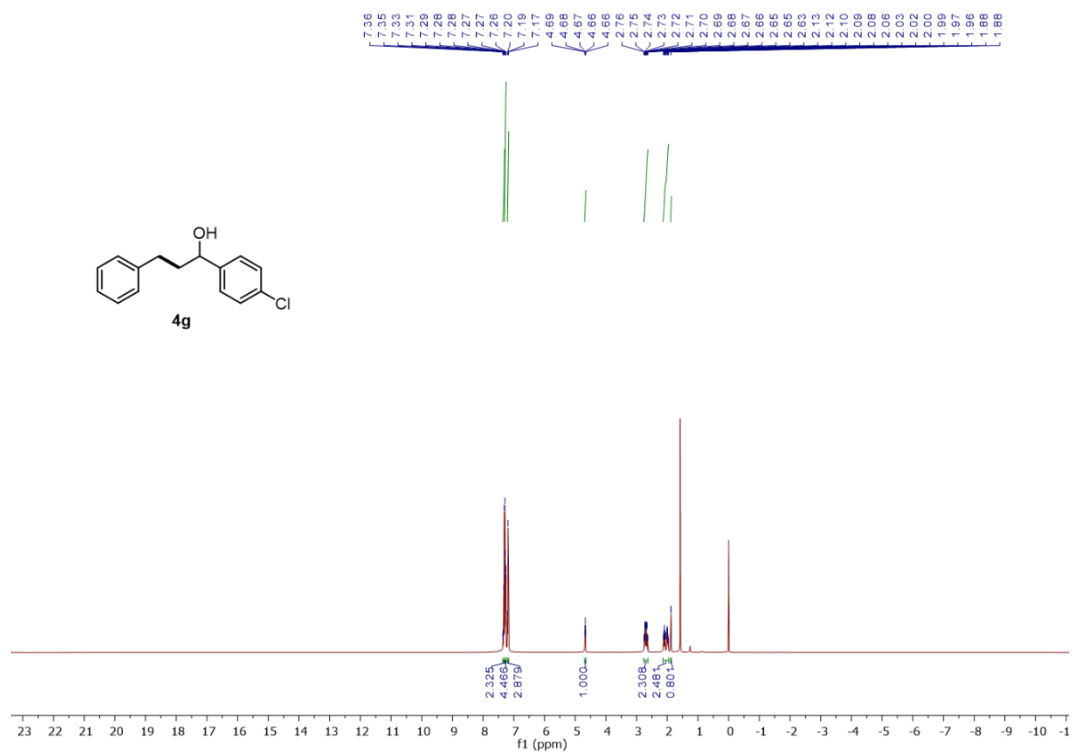

Figure S32:  $^1\text{H}$  NMR spectra of 1-(4-chlorophenyl)-3-phenylpropan-1-ol(**4g**) recorded in  $\text{CDCl}_3$ .



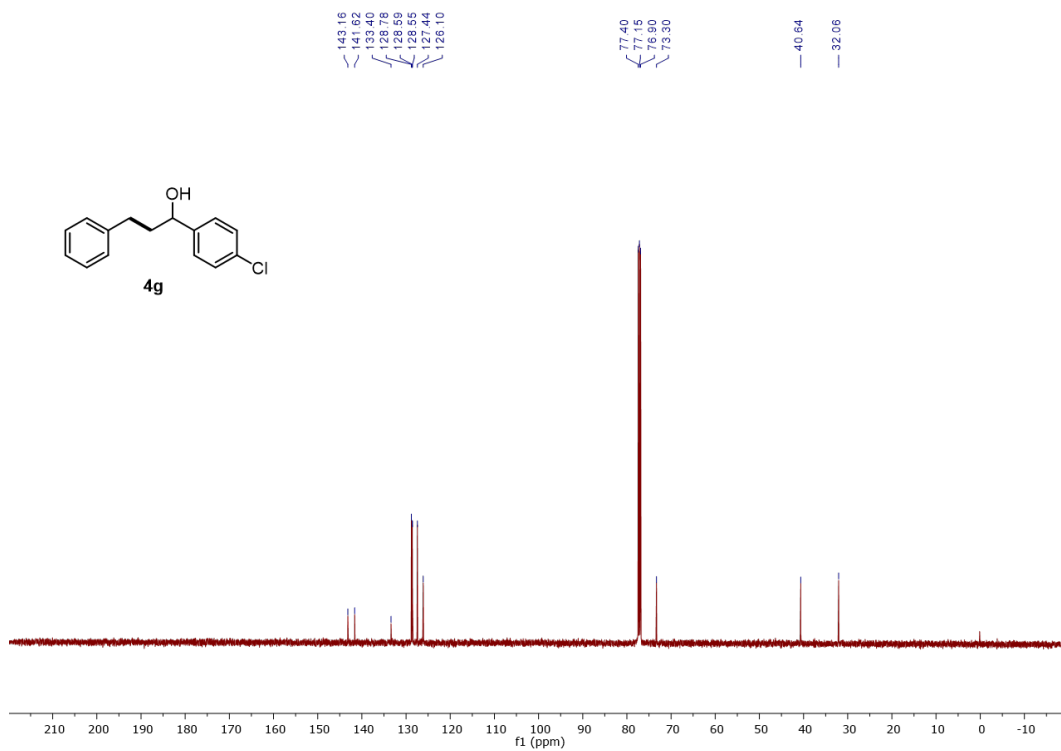

Figure S33:  $^{13}\text{C}$   $\{^1\text{H}\}$  NMR spectra of 1-(4-chlorophenyl)-3-phenylpropan-1-ol (**4g**) recorded in  $\text{CDCl}_3$ .

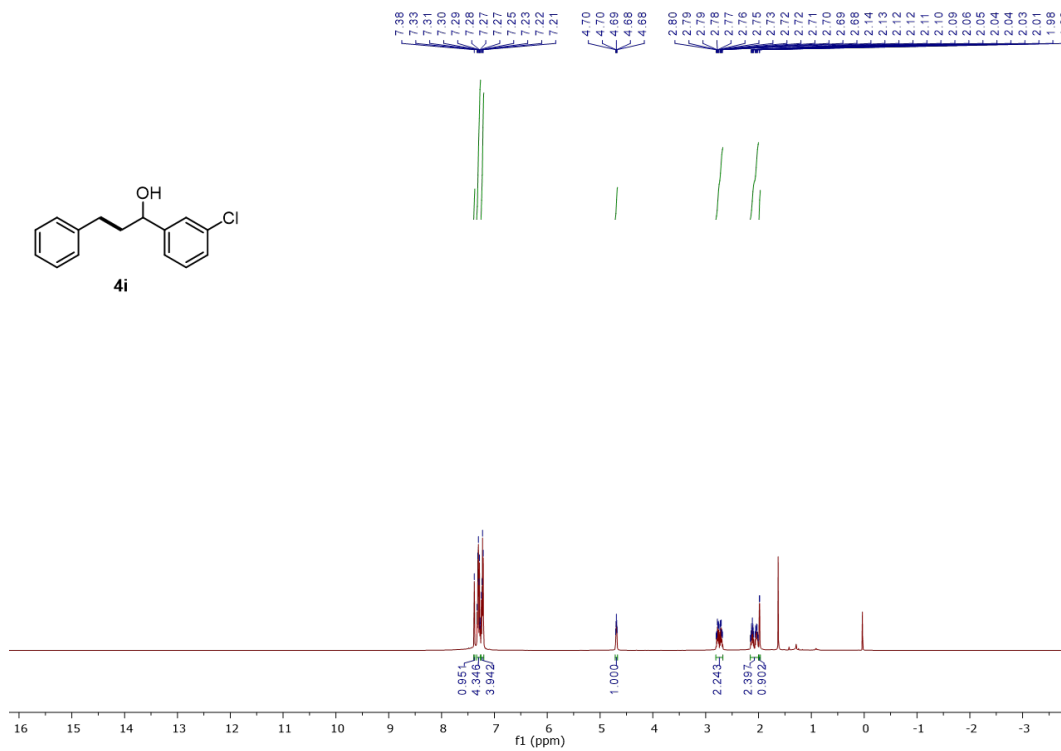

Figure S34:  $^1\text{H}$  NMR spectra of 1-(3-chlorophenyl)-3-phenylpropan-1-ol (**4i**) recorded in  $\text{CDCl}_3$ .

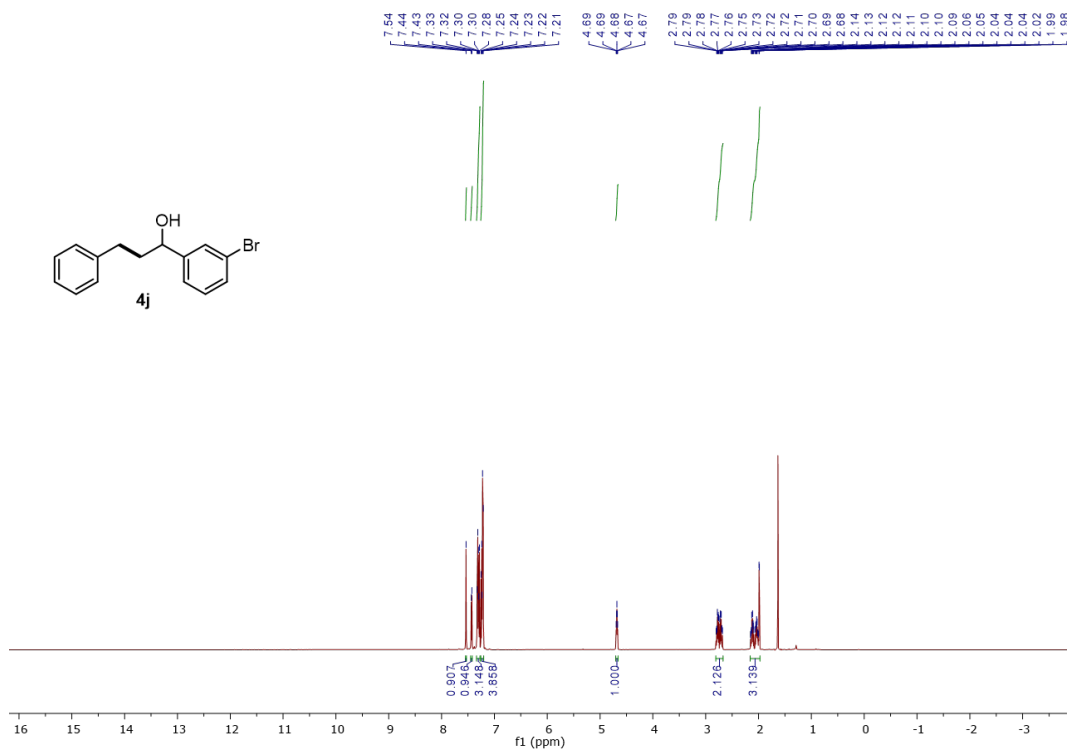

Figure S35:  $^1\text{H}$  NMR spectra of 1-(3-bromophenyl)-3-phenylpropan-1-ol(**4j**) recorded in CDCl<sub>3</sub>.

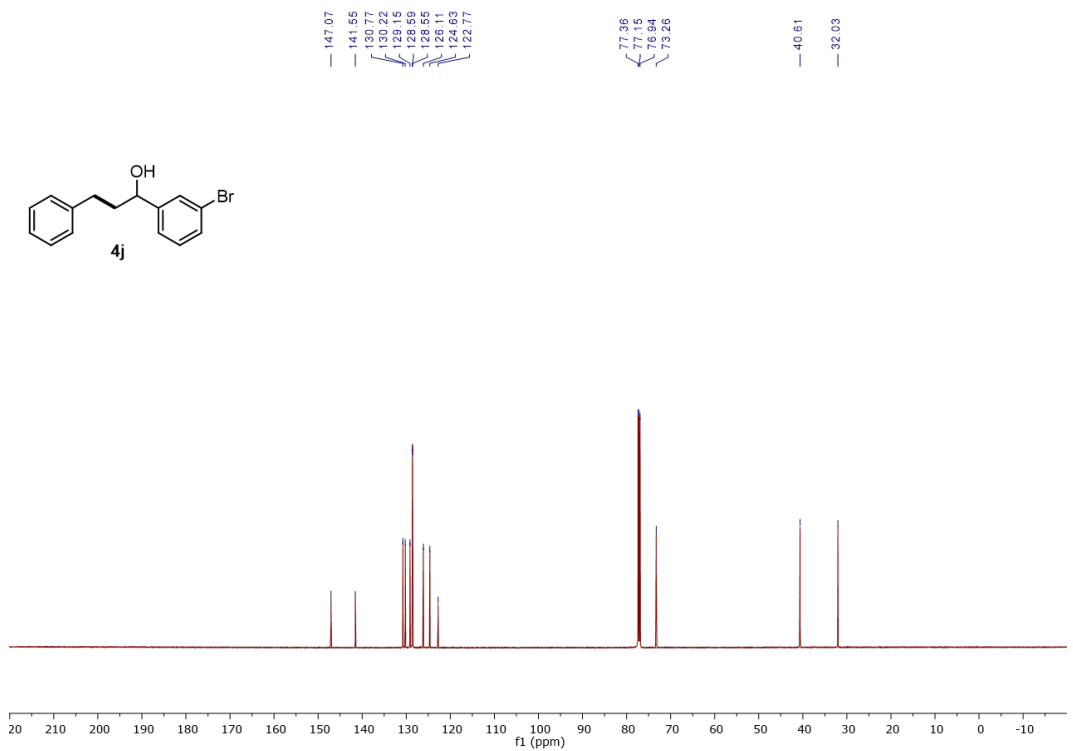

Figure S36:  $^{13}\text{C}\{^1\text{H}\}$  NMR spectra of 1-(3-bromophenyl)-3-phenylpropan-1-ol(**4j**) recorded in CDCl<sub>3</sub>.

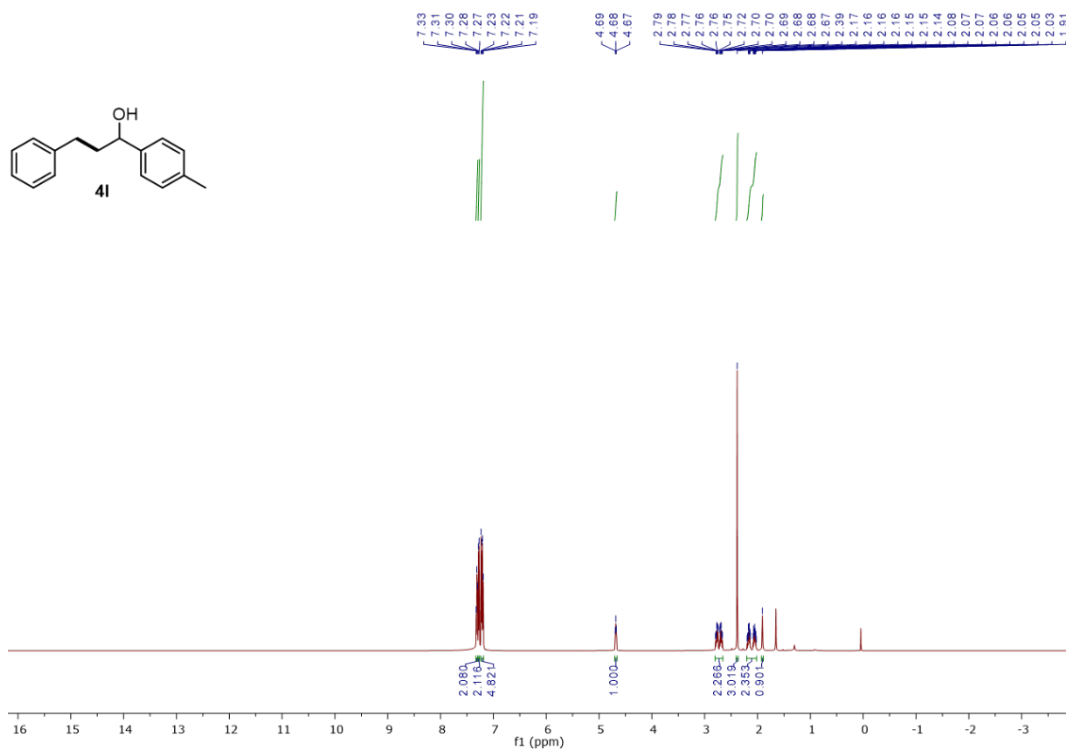

Figure S37:  $^1\text{H}$  NMR spectra of 3-phenyl-1-(p-tolyl)propan-1-ol (**4I**) recorded in CDCl<sub>3</sub>.

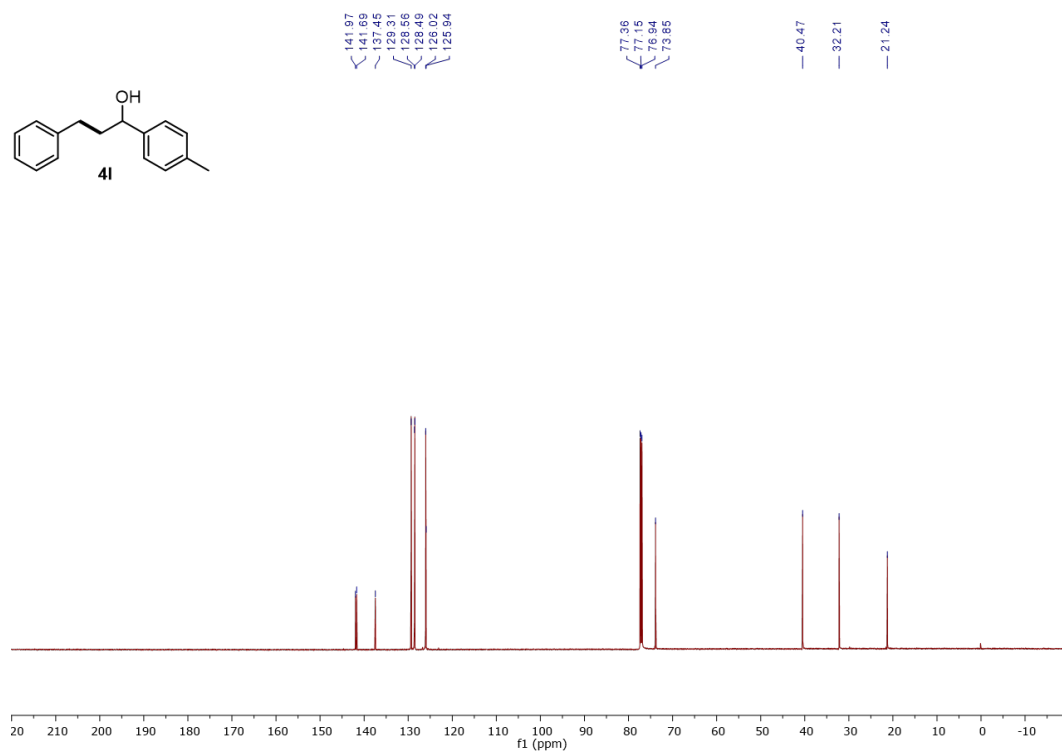

Figure S38:  $^{13}\text{C}\{^1\text{H}\}$  NMR spectra of 3-phenyl-1-(p-tolyl)propan-1-ol (**4I**) recorded in CDCl<sub>3</sub>.

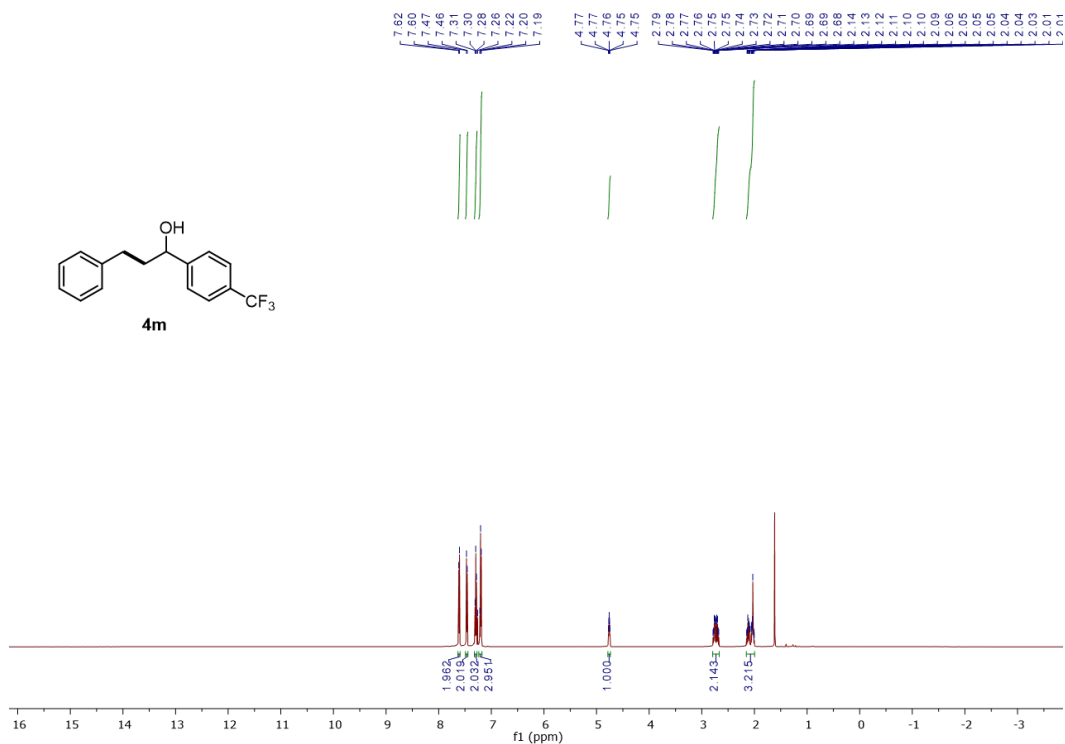

Figure S39: <sup>1</sup>H NMR spectra of 3-phenyl-1-(4-(trifluoromethyl)phenyl)propan-1-ol(4m) recorded in CDCl<sub>3</sub>.

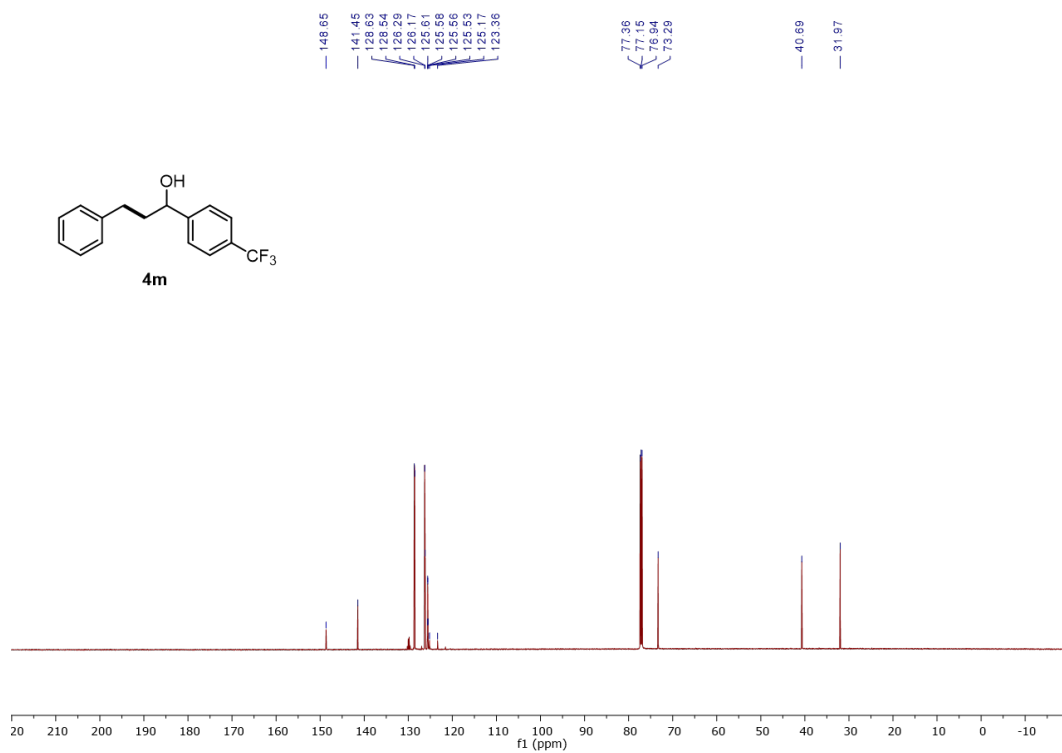

Figure S40: <sup>13</sup>C{<sup>1</sup>H} NMR spectra of 3-phenyl-1-(4-(trifluoromethyl)phenyl)propan-1-ol(4m) recorded in CDCl<sub>3</sub>.

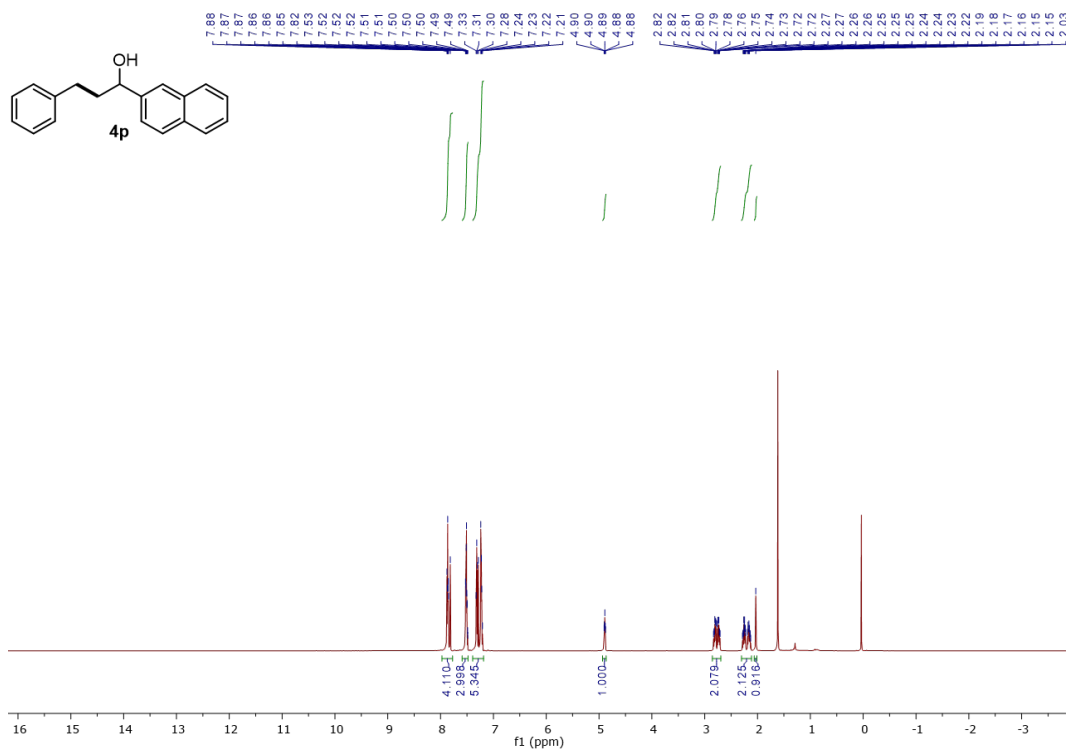

Figure S41:  $^1\text{H NMR}$  spectra of 1-(naphthalen-2-yl)-3-phenylpropan-1-ol(**4p**) recorded in CDCl<sub>3</sub>.

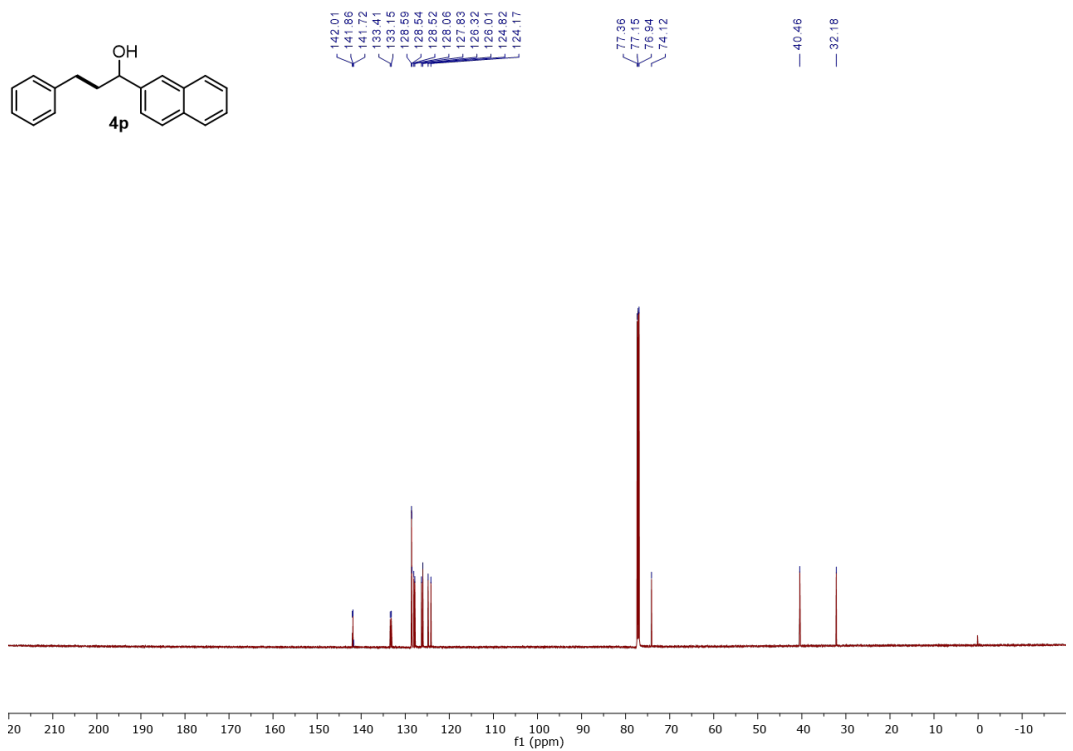

Figure S42:  $^{13}\text{C}\{^1\text{H}\}$  NMR spectra of 1-(naphthalen-2-yl)-3-phenylpropan-1-ol(**4p**) recorded in CDCl<sub>3</sub>.

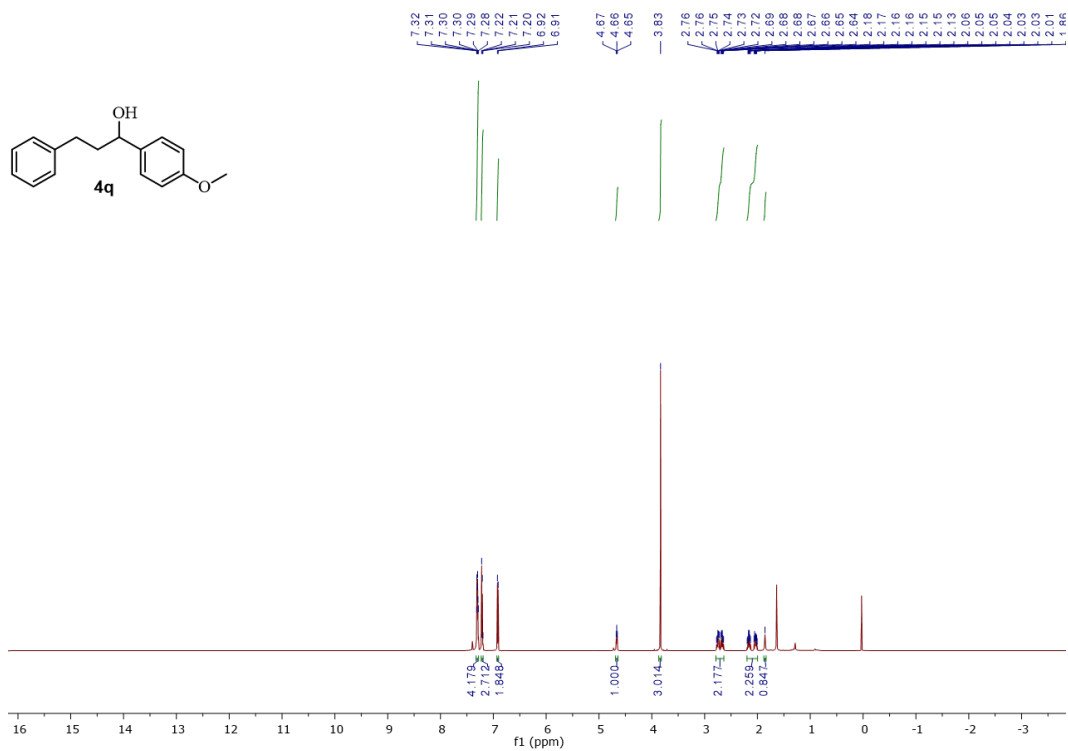

Figure S43: <sup>1</sup>H NMR spectra of 1-(4-methoxyphenyl)-3-phenylpropan-1-ol(**4q**) recorded in CDCl<sub>3</sub>.

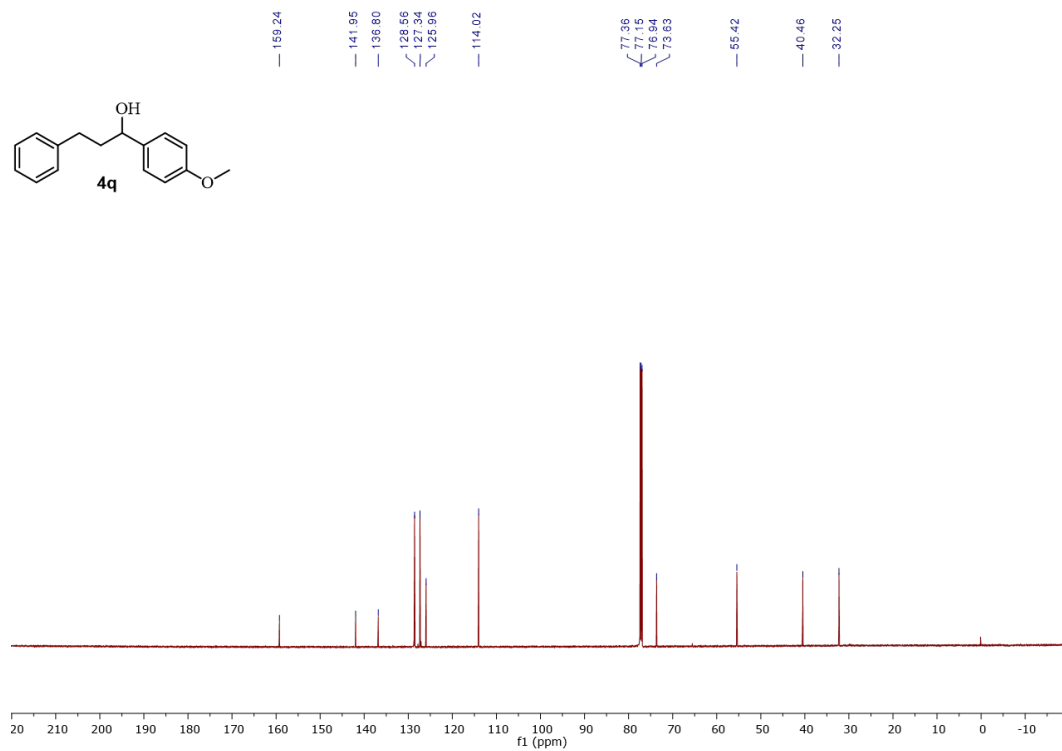

Figure S44: <sup>13</sup>C{<sup>1</sup>H} NMR spectra of 1-(4-methoxyphenyl)-3-phenylpropan-1-ol(**4q**) recorded in CDCl<sub>3</sub>.



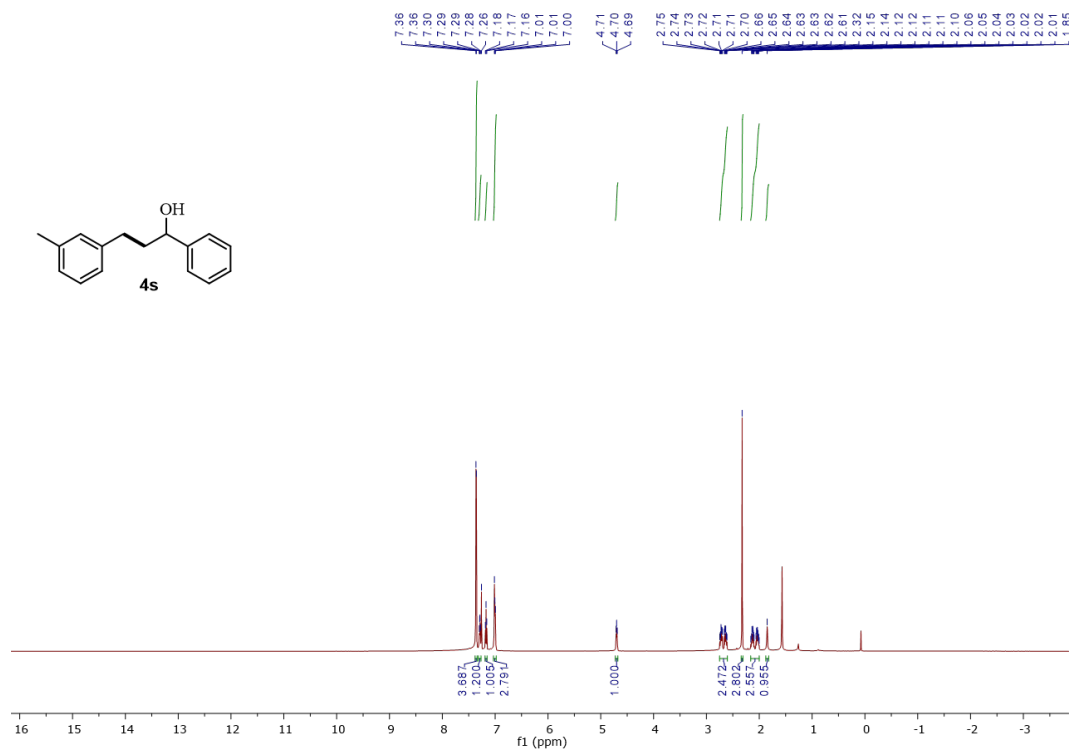

Figure S47: <sup>1</sup>H NMR spectra of 1-phenyl-3-(m-tolyl)propan-1-ol (**4s**) recorded in CDCl<sub>3</sub>.

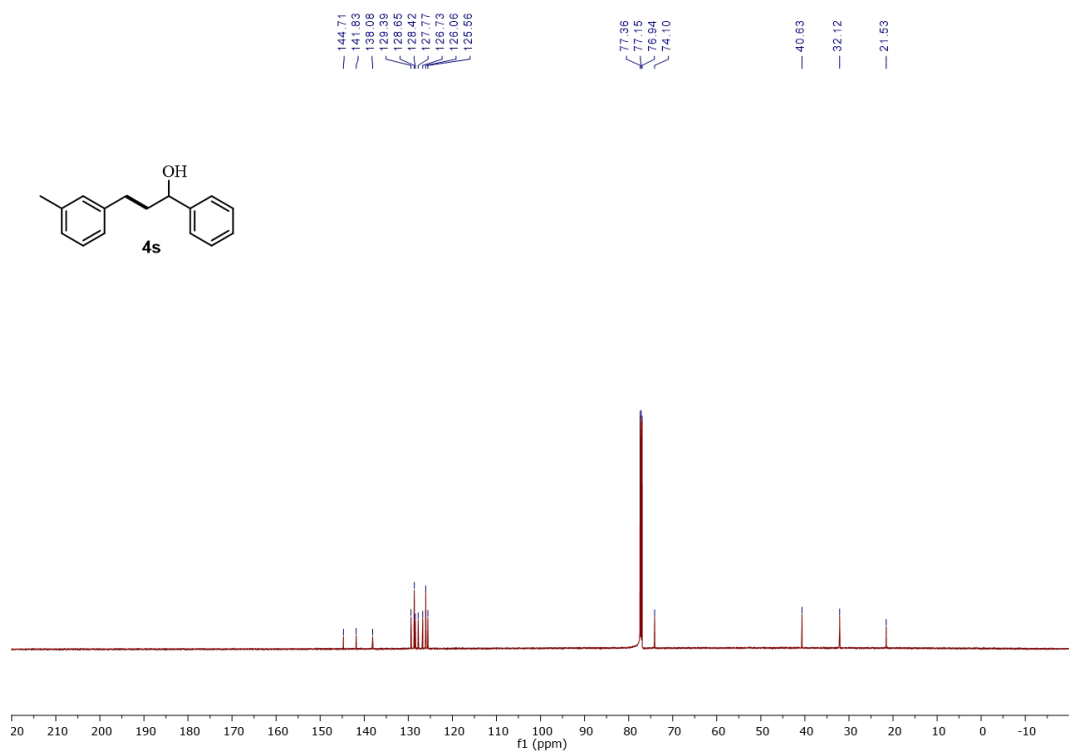

Figure S48: <sup>13</sup>C{<sup>1</sup>H} NMR spectra of 1-phenyl-3-(m-tolyl)propan-1-ol (**4s**) recorded in CDCl<sub>3</sub>.



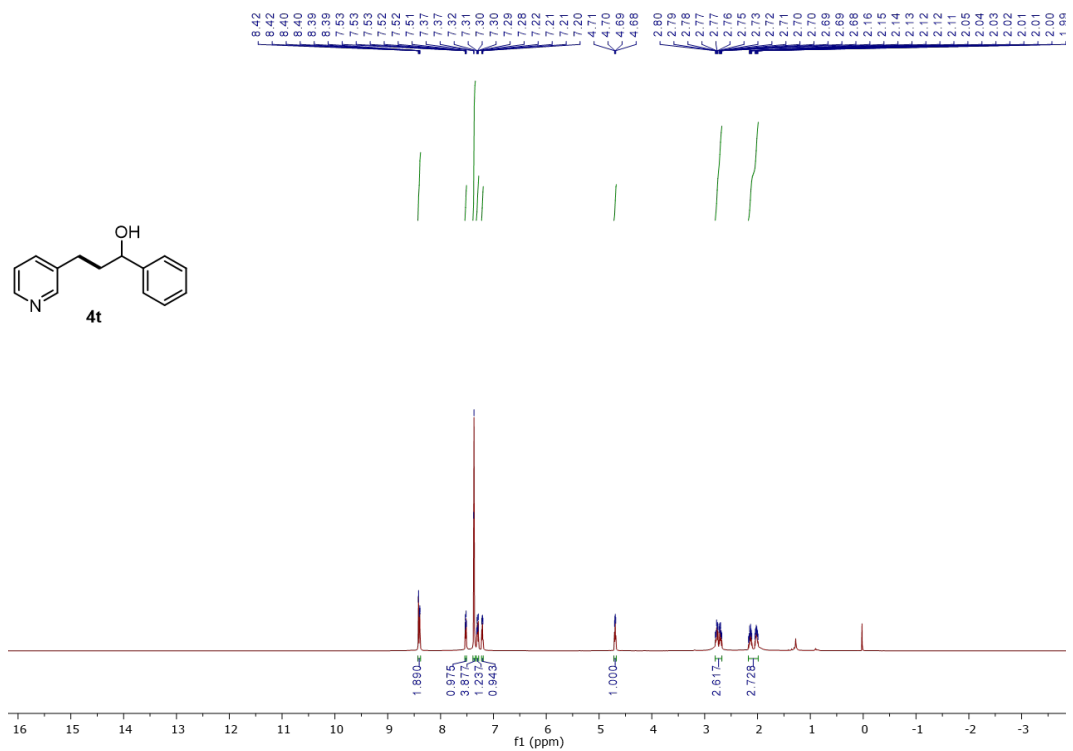

Figure S49:  $^1\text{H}$  NMR spectra of 1-phenyl-3-(pyridin-3-yl)propan-1-ol(**4t**) recorded in CDCl<sub>3</sub>.

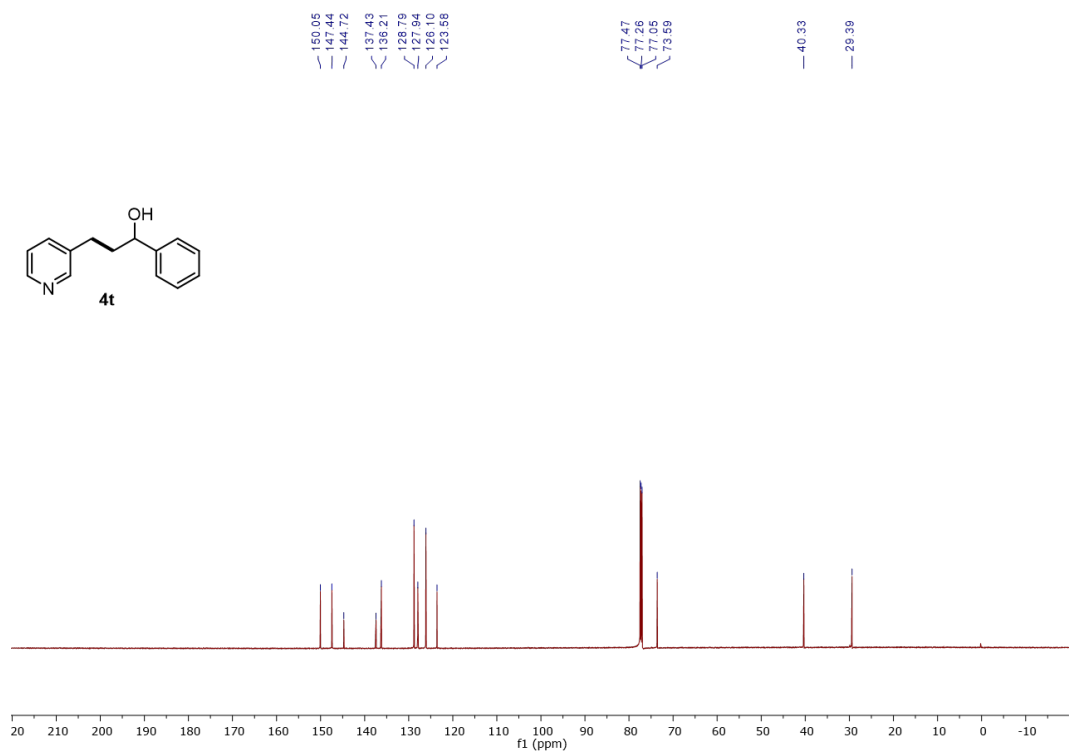

Figure S50:  $^{13}\text{C}\{^1\text{H}\}$  NMR of 1-phenyl-3-(pyridin-3-yl)propan-1-ol(**4t**) recorded in CDCl<sub>3</sub>.

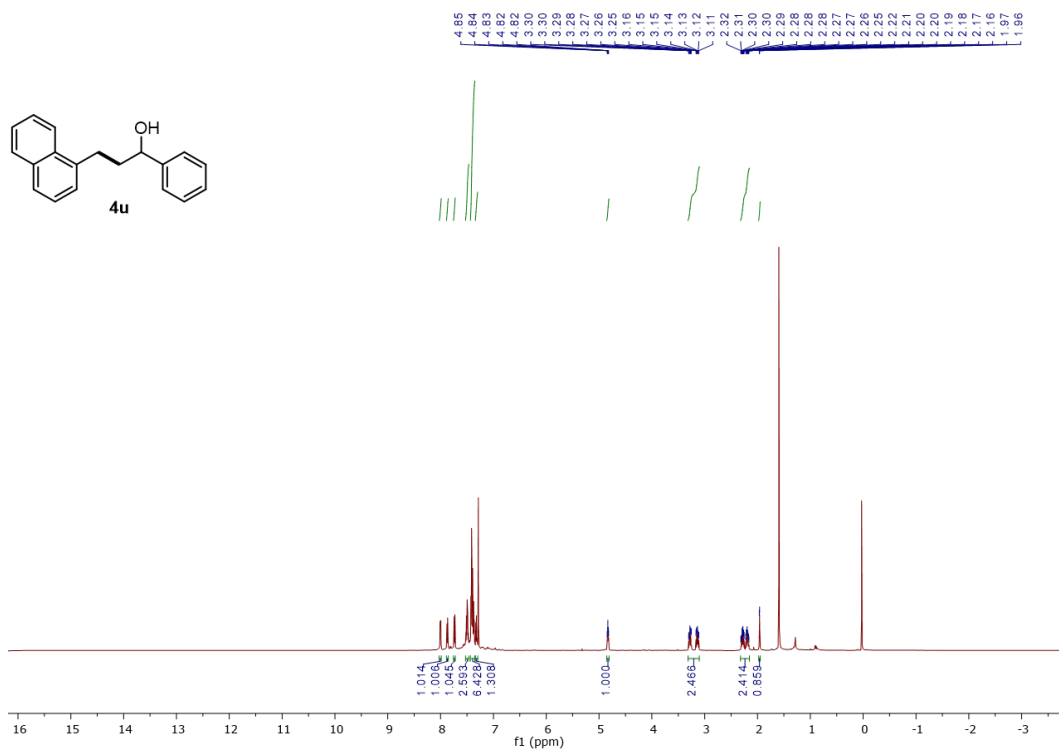

Figure S51:  $^1\text{H}$  NMR spectra of 3-(naphthalen-1-yl)-1-phenylpropan-1-ol(**4u**) recorded in  $\text{CDCl}_3$ .

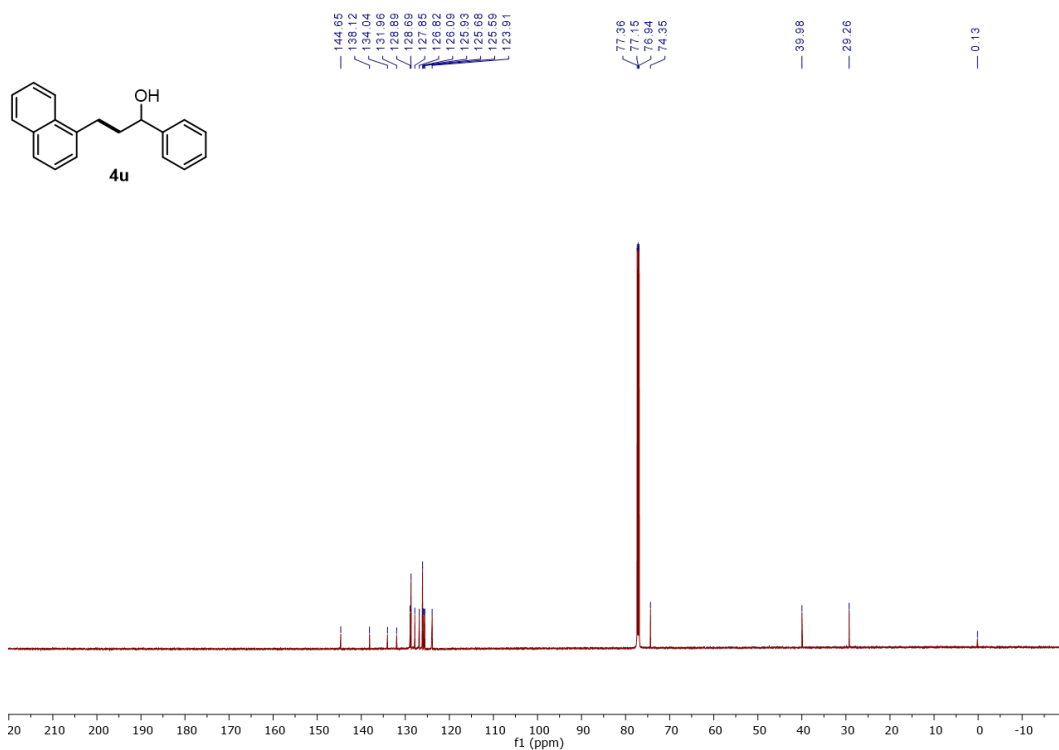

Figure S52:  $^{13}\text{C}\{^1\text{H}\}$  NMR spectra of 3-(naphthalen-1-yl)-1-phenylpropan-1-ol(**4u**) recorded in  $\text{CDCl}_3$ .

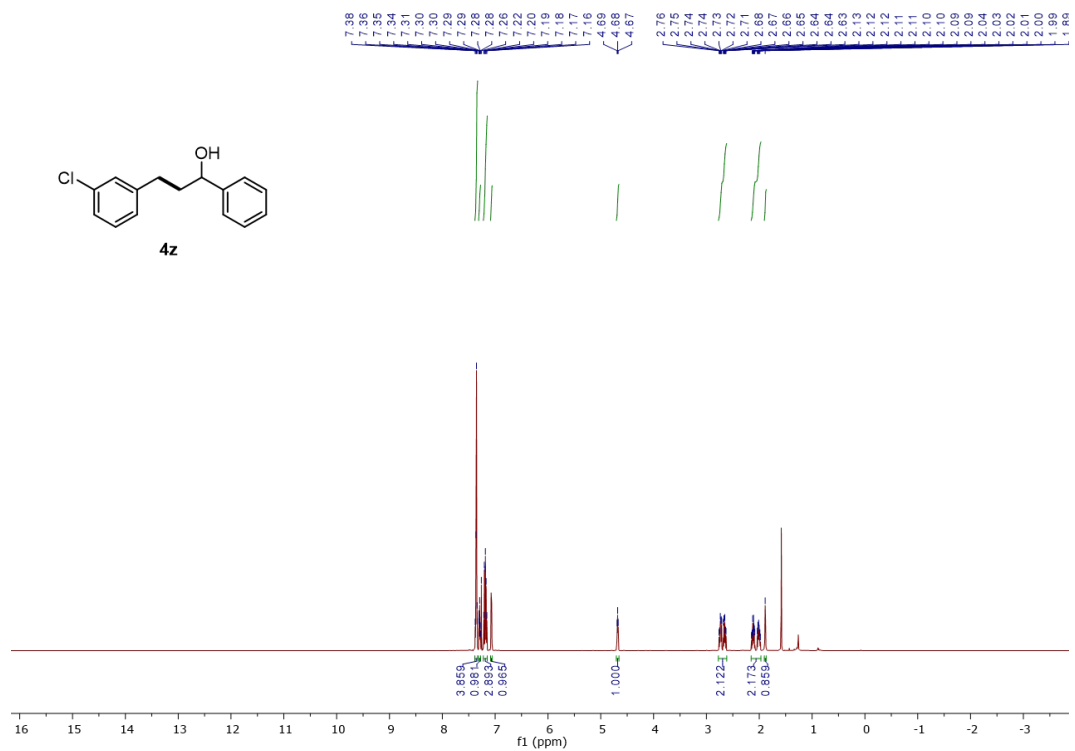

Figure S53:  $^1\text{H}$  NMR spectra of 3-(3-chlorophenyl)-1-phenylpropan-1-ol(**4z**) recorded in CDCl<sub>3</sub>.

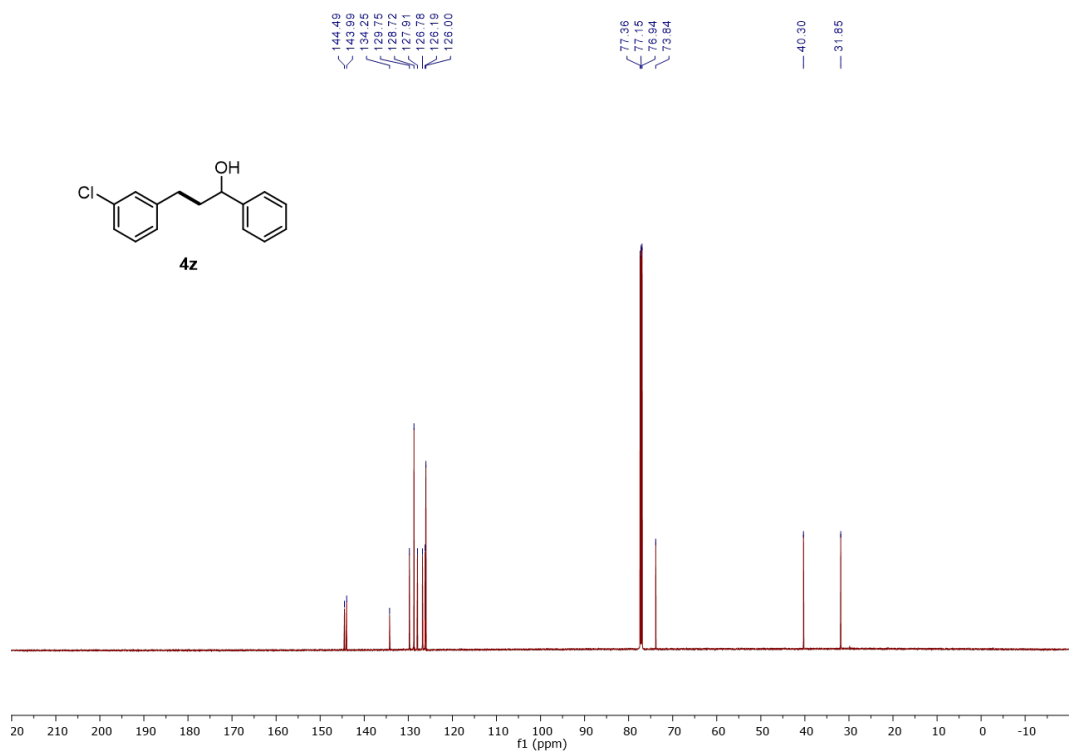

Figure S54:  $^{13}\text{C}\{^1\text{H}\}$  NMR spectra of 3-(3-chlorophenyl)-1-phenylpropan-1-ol(**4z**) recorded in CDCl<sub>3</sub>.

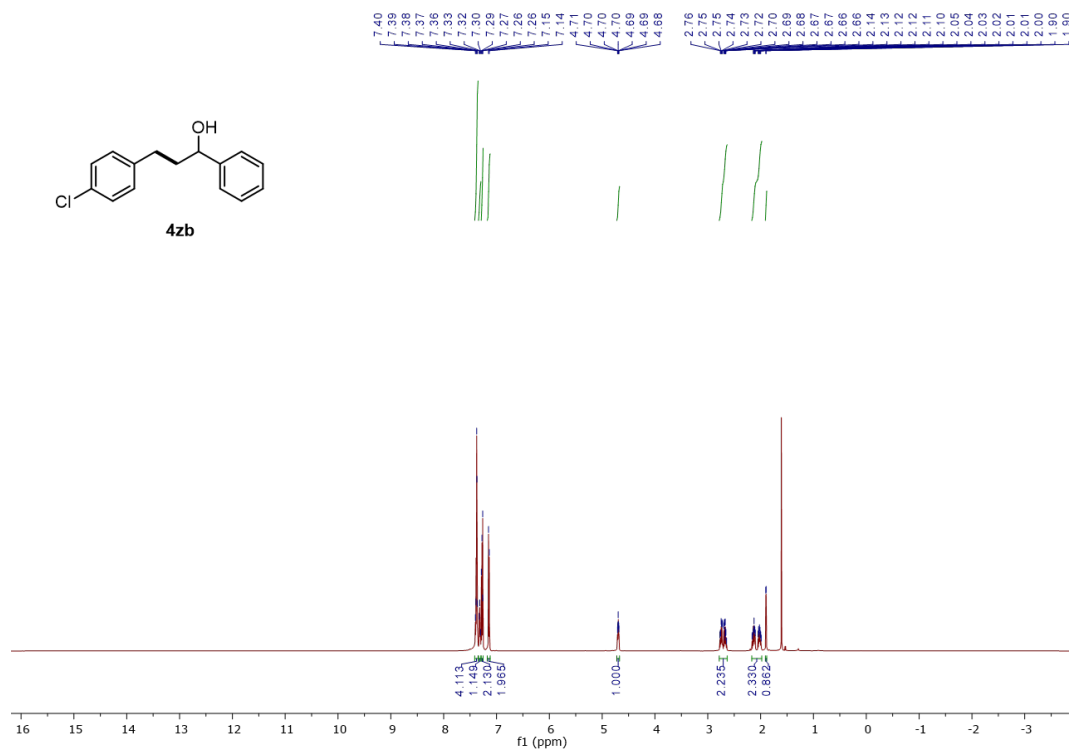

Figure S55:  $^1\text{H}$  NMR spectra of 3-(4-chlorophenyl)-1-phenylpropan-1-ol (**4zb**) recorded in CDCl<sub>3</sub>.

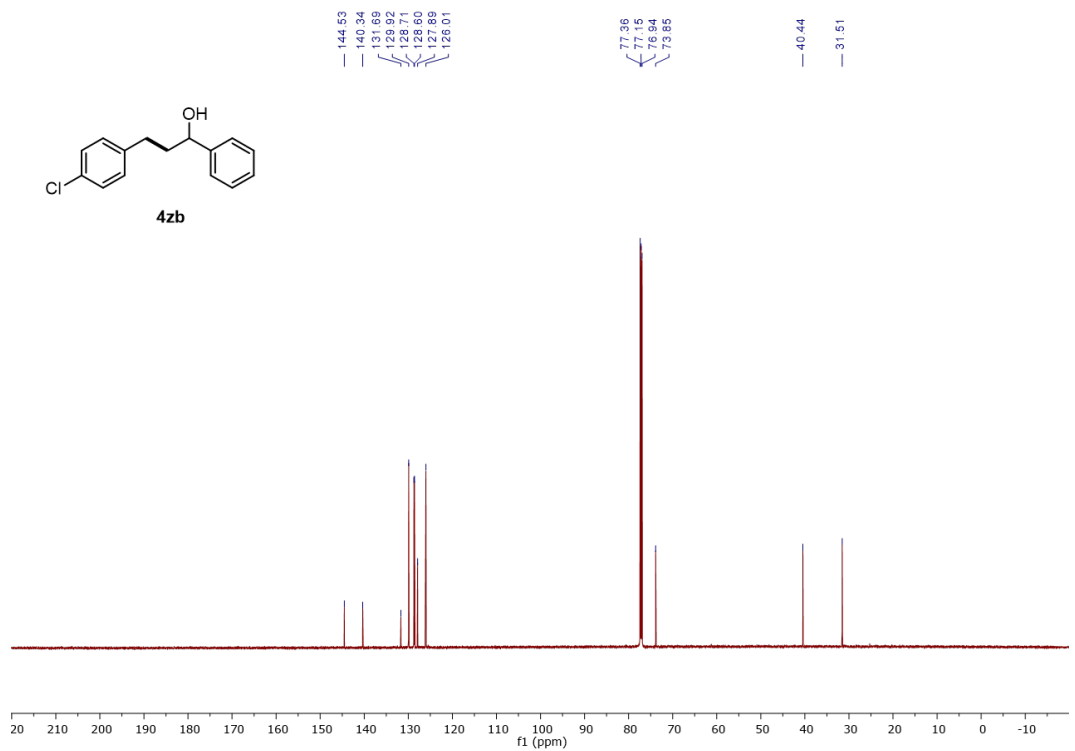

Figure S56:  $^{13}\text{C}\{^1\text{H}\}$  NMR spectra of 3-(4-chlorophenyl)-1-phenylpropan-1-ol (**4zb**) recorded in CDCl<sub>3</sub>.

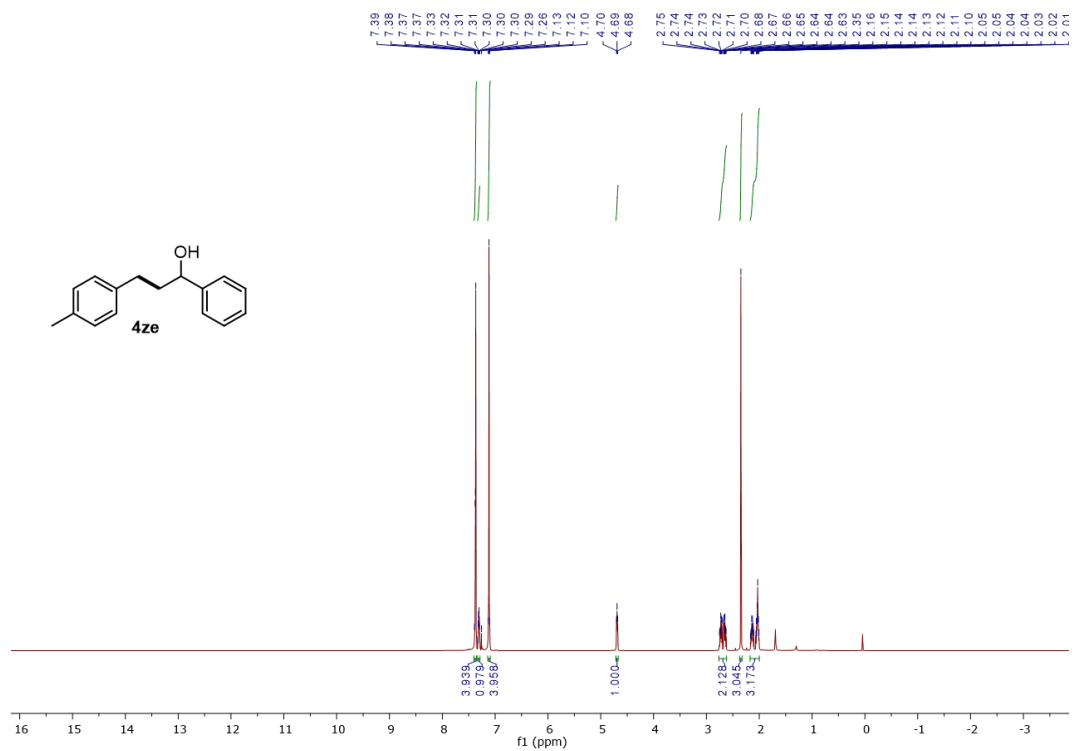

Figure S57: <sup>1</sup>H NMR spectra of 1-phenyl-3-(p-tolyl)propan-1-ol(4ze) recorded in CDCl<sub>3</sub>.

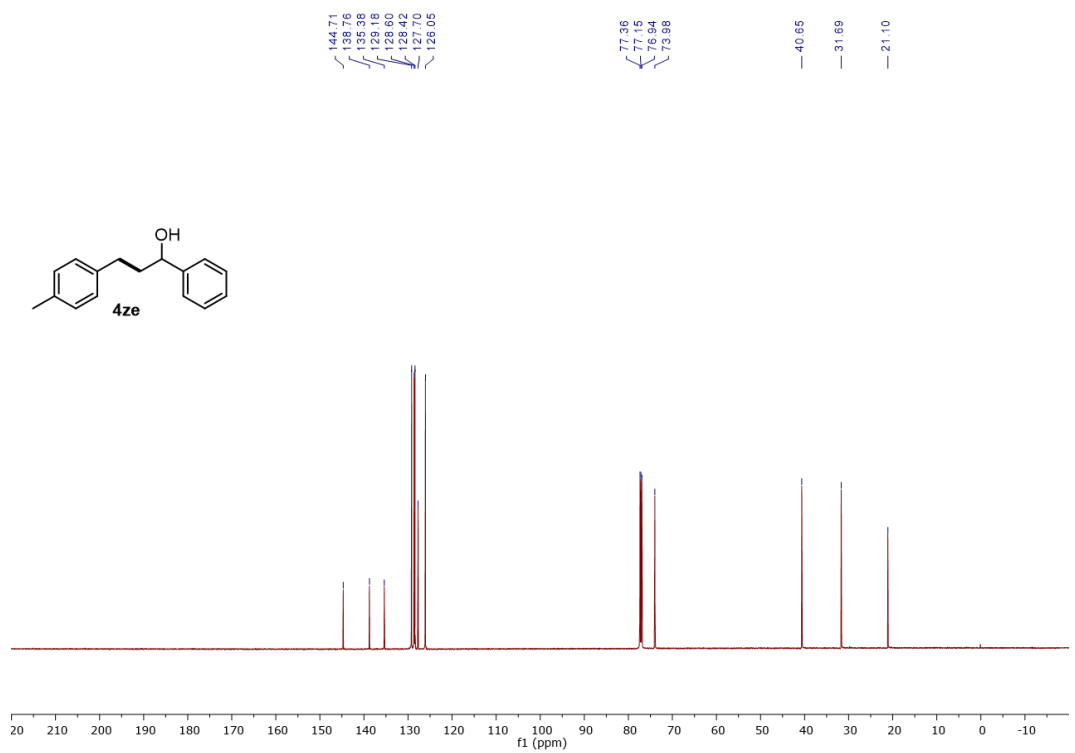

Figure S58: <sup>13</sup>C{<sup>1</sup>H} NMR spectra of 1-phenyl-3-(p-tolyl)propan-1-ol(4ze) recorded in CDCl<sub>3</sub>.

## 6. Calculation of Kinetic Isotopic Effect (KIE):

$$\frac{k_{\text{Ha}}}{k_{\text{D}}} = \text{KIE}$$

Where,  $k_{\text{Ha}}$  and  $k_{\text{D}}$  are the proton content and deuterium content at  $C_a$  of the product **4a** as determined by  $^1\text{H-NMR}$

$$k_{\text{Ha}} = \frac{\text{Integral value}}{\text{Number of protons}} * 100 = A * 100$$

$$k_{\text{D}} = (1-A)*100$$

## 7. Magnetic moment of **5** in solution (Evan's method):

Magnetic moment in solution was measured by following the Evan's NMR method.<sup>1-3</sup> A solution of ( $^{\text{Ph}_2}\text{NNN}$ )CrCl<sub>3</sub> (0.00055 g, 0.00125 mmol) in a 0.5 mL mixture of MeOH- $d_4$ / $t$ -BuOH (98:2) was prepared. To the same NMR tube a capillary containing the 2%  $t$ -BuOH in MeOH- $d_4$  solution was inserted. NMR spectrum was recorded on a Bruker ASCEND 600 operating at 600 MHz. A chemical shift difference of 30 Hz was observed for the  $t$ -BuOH peak for the samples in the inner and outer tubes. Based on the equation<sup>2</sup>  $\mu_{\text{B}} = 798(\chi_{\text{M}}T)^{0.5}$  [T= temperature of measurement and  $\chi_{\text{M}} = 3\Delta f/1000fc$ , where  $\Delta f$  is the paramagnetic shift of the solvent in Hz,  $f$  is the frequency of the NMR instrument in Hz, and  $c$  is the molar concentration of the metal complex], we have observed the magnetic moment  $\mu_{\text{eff}} = 3.4 \mu_{\text{B}}$  which is in agreement with a octahedral Cr(III) species.<sup>4</sup>

Subsequently, NaOH (0.044g, 1.1 mmol) was added to a stock solution of ( $^{\text{Ph}_2}\text{NNN}$ )CrCl<sub>3</sub> (0.0006 g, 0.00145 mmol) in a 0.5 mL mixture of MeOH- $d_4$ / $t$ -BuOH (98:2). To the same NMR tube a capillary containing the 2%  $t$ -BuOH in MeOH- $d_4$  solution was inserted. NMR spectrum was recorded on a Bruker ASCEND 600 operating at 600 MHz. A chemical shift difference of 72 Hz was observed for the  $t$ -BuOH peak for the samples in the inner and outer tubes which gave a magnetic moment of  $4.8 \mu_{\text{B}}$  which is in agreement with a octahedral Cr(II) species.<sup>4</sup>

## 8. References:

1. D. F. Evans, *J Chem Soc.*, 1959, DOI: 10.1039/JR9590002003, 2003-2005.
2. T. Inagaki, A. Ito, J.-i. Ito and H. Nishiyama, *Angew. Chem. Int. Ed.*, 2010, **49**, 9384-9387.
3. G. J. P. Britovsek, V. C. Gibson, S. K. Spitzmesser, K. P. Tellmann, A. J. P. White and D. J. Williams, *J. Chem. Soc., Dalton Trans.*, 2002, DOI: 10.1039/B106614P, 1159-1171.
4. J. E. Huheey, E. A. Keiter, R. L. Keiter, O. K. Medhi, *Inorganic Chemistry: Principles of Structure and Reactivity*. Pearson Education: **2006**.
